# Supplementary material for: Spi-1, Fli-1 and Fli-3 (miR-17-92) Oncogenes Contribute to a Single Oncogenic Network Controlling Cell Proliferation in Friend Erythroleukemia
Source: PLoS One. 2012 Oct 8;7(10):e46799. doi: 10.1371/journal.pone.0046799 (PMC3466182; doi:10.1371/journal.pone.0046799)
Supplement: Data S2 — GSEA analyses. Lists of predicted miRNA targets were established from the miRWalk database (http://www.umm.uni-heidelberg.de/apps/zmf/mirwalk/) by compiling all mouse transcripts with 3′UTR harboring putative target sequences predicted by the three different algorithms miRanda, miRDB and miRWalk with a p value<0.05. Predicted target gene lists were then used to perform gene set enrichment analyses using the GSEA software v2.0 (http://www.broadinstitute.org/gsea/index.jsp/) after uploading the above three microarray data files and performing two successive comparisons (−H−D vs +H+D and −H−D vs +H−D). Gene list results are given on separate sheets for each miRNA in file Data S2 (“Gene Lists GSEA.xlsx”): Column 1: predicted target gene list used for GSEA; Column 2: subset list of predicted target genes present on microaarray; Column 3: leading edge subset of genes that were found to be either up or downregulated by comparing −H−D vs +H+D (normalized p value indicated on the top of the column); Column 4: leading edge subset gene list that were found to be either up or downregulated by comparing −H−D vs +H+D (normalized p value indicated on the top of the column); Column 5: intersection between leading edge gene lists in columns 3 and 4. Lists of leading edge common targets for miR-17 and miR-20 (intersection of the four gene lists in columns 3 and 4 on sheets miR-17 and miR-20), miR-19a and miR19b (intersection of the four gene lists in columns 3 and 4 on sheets miR-19a and miR-19b) as well as for miR-451 (intersection of gene lists in columns 3 and 4 in sheet miR-451) that have been used to generate the histograms presented in Figure 3B, C and D are given in sheet named «Gene list profile». (XLSX) [file pone.0046799.s002.xlsx]

## Sheet: miR-17
miR-17 Targets
		GSEA (+H+D/-H-D)	GSEA (+H-D/-H-D)
		NOM p-val=0.028	NOM p-val=0.000
Predicted	Probed	UP-regulated (+H+D/-H-D)	UP-regulated (+H-D/-H-D)	Common UP-Regulated
1200015N20RIK	1300010M03RIK	1300010M03RIK	ABCG4	ABCG4
1300010M03RIK	1600012H06RIK	2310002B06RIK	ACSL4	ACSL4
1600012H06RIK	1700021K19RIK	ABCG4	CAMK1D	DNAJA4
1700021K19RIK	1810055E12RIK	ACSL4	CCNG2	DUSP2
1810055E12RIK	2010321M09RIK	BC038286	CDK2	E2F5
2010321M09RIK	2210012G02RIK	BRMS1L	DIRC2	EEA1
2210012G02RIK	2310002B06RIK	CASP12	DNAJA4	EIF5A2
2310002B06RIK	2310014L17RIK	CCNT2	DUSP2	ELK3
2310014L17RIK	2700078E11RIK	CD36	E2F5	ENPP5
2410002I01RIK	4933426M11RIK	DNAJA4	EEA1	EZH1
2700078E11RIK	4933439F18RIK	DUSP2	EIF4G2	FBXO25
4933426M11RIK	5730470L24RIK	E2F5	EIF5A2	HBP1
4933439F18RIK	6030458C11RIK	EEA1	ELK3	IKBKB
5730410E15RIK	AA409316	EIF5A2	ENPP5	MKNK2
5730470L24RIK	ABCA1	ELK3	EZH1	BC038286
5730596K20RIK	ABCG4	ENPP5	FBXO25	2310002B06RIK
6030436E02RIK	ACSL4	EZH1	HBP1	P2RX4
6030458C11RIK	ANKFY1	FBXO25	IKBKB	RASL11B
6430573F11RIK	ANKRD28	GOLGA1	IL6ST	RPS6KA5
A630047E20RIK	AP3S2	GOSR1	MAP3K12	SLC2A4
A730037C10RIK	ARHGAP1	HBP1	MAP3K5	SMAD7
AA409316	ARHGAP12	IKBKB	MIDN	SMOC2
AAK1	ARHGEF3	JAK1	MKNK2	SYAP1
ABCA1	ASB3	MKNK2	ZFP238	TUSC2
ABCG4	ATAD2	NEDD4L	BC038286	TXNIP
AC140392.3	ATP11C	P2RX4	1700021K19RIK	XRCC4
AC160757.3-202	ATXN1L	RASL11B	ZFP367	YPEL2
ACSL4	BAMBI	RPS6KA5	2310002B06RIK
AFG3L2	BC038286	SLC18A2	OGFRL1
ANKFY1	BC043118	SLC2A4	P2RX4
ANKRD28	BICD2	SLC40A1	PPP6C
ANKRD52	BRMS1L	SMAD7	RAB22A
ANKRD9	C1QB	SMOC2	RASL11B
ANO5	C80913	SYAP1	RPS6KA5
AP3S2	CAMK1D	TUSC2	SEMA5A
ARHGAP1	CAMK4	TXNIP	SEMA7A
ARHGAP12	CASP12	ULK1	SLC2A4
ARHGAP26	CCNG1	XRCC4	SMAD7
ARHGEF3	CCNG2	XRN1	SMOC2
ARL4C	CCNT2	YPEL2	SYAP1
ARV1	CD36		TRAF4
ASAH3L	CD69		TUSC2
ASB3	CDK2		TXNIP
ATAD2	CDKN1A		USP3
ATG16L1	CELSR2		XRCC4
ATG7	CFL2		YPEL2
ATP11C	CHAF1A		ZFP91
ATXN1L	CHRNA1
BAHD1	CLOCK
BAMBI	COL17A1
BC038286	COL19A1
BC043118	COL4A2
BICD2	CRK
BMPR2	CROT
BRMS1L	DCTN4
BTBD10	DDX5
C1QB	DGKE
C230093N12RIK	DIRC2
C77080	DMTF1
C80913	DNAJA4
CADPS	DNASE1L3
CAMK1D	DOCK4
CAMK2N1	DUSP2
CAMK4	E2F1
CAMSAP1L1	E2F5
CAR10	EEA1
CASC4	EIF4G2
CASP12	EIF5A2
CCDC100	ELK3
CCDC128	ENPP5
CCDC137	EPAS1
CCNG1	EZH1
CCNG2	F3
CCNT2	FBXO25
CD36	FMNL3
CD69	FURIN
CDC37L1	GAB1
CDK2	GDA
CDKN1A	GNPNAT1
CDKN2AIPNL	GOLGA1
CELSR2	GOLGA2
CEP76	GOSR1
CFL2	GTF2H2
CHAF1A	HAS2
CHD9	HBP1
CHMP4C	HELB
CHRNA1	HIF1A
CHRNA2	HMGB3
CLCN7	ICOS
CLEC1A	IKBKB
CLIP4	IL6ST
CLOCK	IRAK2
CMPK1	JAK1
COL17A1	LAPTM4A
COL19A1	LHX8
COL4A2	LIMK1
COL4A3	LMAN2
COL4A4	MAOA
COLEC10	MAP3K12
CRCT1	MAP3K14
CREB1	MAP3K5
CRK	MAP3K8
CROT	MAPK14
CT025653.7-201	MAPRE1
CTDSPL2	MAPRE3
CYYR1	MASTL
D030056L22RIK	MAT2B
DAGLB	METAP1
DCTN4	MGA
DCUN1D3	MIDN
DDHD1	MKNK2
DDX5	MTPN
DERL2	MYNN
DGKE	MYO1D
DGKQ	NANOS1
DIP2A	NCOA3
DIRC2	NEDD4L
DMTF1	NETO2
DNAJA4	NEUROG2
DNAJC18	NKIRAS1
DNASE1L3	NOL4
DOCK4	OGFRL1
DPYSL5	OXR1
DUSP2	P2RX4
DYNC1LI2	PAFAH1B2
DYRK4	PBX3
E030049G20RIK	PCDH7
E2F1	PLAGL2
E2F5	PLEKHA3
EEA1	POLR3G
EGFR	PPARA
EGLN3	PPP1R3B
EIF2AK2	PPP3R1
EIF4G2	PPP6C
EIF5A2	PTEN
ELK3	PTPN4
ENPP5	RAB22A
EPAS1	RABGAP1
EPHA4	RASD1
EPHA5	RASL11B
EPHA7	RASSF2
ERCC6	RB1CC1
EREG	RBBP7
EZH1	RBL2
F2RL2	RGMB
F3	RHOV
FBXO25	RNF128
FBXO28	RP2H
FBXO39	RPS6KA5
FGD4	RRAGD
FGD5	RRM2
FMN1	RUTBC2
FMNL3	SEMA5A
FNDC1	SEMA7A
FNDC3B	SERTAD2
FOXB1	SF3B1
FRMD6	SLC18A2
FURIN	SLC2A4
FUT9	SLC40A1
FYCO1	SMAD7
G6PC	SMOC1
GAB1	SMOC2
GABBR2	SOCS7
GBF1	SORL1
GDA	SRRP
GNPNAT1	STAT3
GOLGA1	STK11
GOLGA2	SYAP1
GOSR1	TBXAS1
GPR157	TES
GTF2H2	TGFBR2
HAS2	TIAM2
HBP1	TIMP2
HELB	TNFAIP1
HIF1A	TNFRSF21
HIGD1A	TOPORS
HLF	TRAF4
HMBOX1	TSG101
HMGB3	TUSC2
HS3ST5	TXNIP
ICOS	UBE3C
IKBKB	UFD1L
IL25	ULK1
IL6RA	USP3
IL6ST	VLDLR
INTS6	WEE1
IQSEC2	XRCC4
IRAK2	XRN1
IRAK4	YPEL2
IRF9	YTHDF3
ISOC1	ZFP148
ITFG1	ZFP238
ITGB8	ZFP367
JAK1	ZFP91
JAZF1
KAT2B
KCNJ10
KIF26B
KLF10
KLF12
KLF9
KLHL20
KLHL23
KLHL28
LACE1
LAPTM4A
LHX8
LHX9
LILRB3
LIMA1
LIMK1
LMAN2
LRCH1
LRRIQ2
MAGI3
MAOA
MAP3K12
MAP3K14
MAP3K2
MAP3K5
MAP3K8
MAP6D1
MAPK14
MAPRE1
MAPRE3
MARCH8
MASTL
MAT2B
METAP1
MFAP3L
MFSD9
MGA
MIDN
MKNK2
MLL1
MTERFD2
MTM1
MTPN
MYCN
MYNN
MYO1D
NAGK
NANOS1
NAPEPLD
NAT12
NCOA3
NEDD4L
NETO2
NEUROG2
NHLRC1
NKAPL
NKIRAS1
NKX3-1
NOL4
NPAS3
NPAT
NPLOC4
NRBP1
NXPH2
OBFC2A
OCRL
OGFRL1
OLR1
OXR1
P2RX4
PAFAH1B2
PAK7
PBX3
PCDH7
PCDHA10
PCDHB17
PDE3B
PDIA6
PFN
PIP4K2C
PLAGL2
PLEKHA3
PNPLA1
POLQ
POLR3G
PPARA
PPP1R3B
PPP2R1B
PPP3R1
PPP6C
PRL7D1
PRR15
PRR16
PSMF1
PTEN
PTPN4
PXK
RAB10
RAB22A
RAB8B
RABGAP1
RASD1
RASL11B
RASSF2
RB1
RB1CC1
RBBP7
RBL2
RCAN3
REPS2
RGL1
RGMA
RGMB
RHBDD1
RHOV
RNF128
RNF152
RNF6
RP2H
RPS6KA5
RRAGD
RRM2
RS1
RSBN1
RUTBC2
SAR1B
SASH1
SCAMP5
SCN1A
SEMA4B
SEMA5A
SEMA7A
SERP1
SERTAD2
SF3B1
SGMS1
SH3BP2
SLC16A12
SLC17A8
SLC18A2
SLC19A2
SLC22A23
SLC24A2
SLC25A36
SLC2A4
SLC30A10
SLC40A1
SLC41A1
SLC5A10
SLC5A7
SMAD7
SMC2
SMOC1
SMOC2
SNX16
SNX8
SOBP
SOCS7
SORL1
SPINLW1
SPOPL
SRRP
ST6GALNAC3
STAT3
STK11
STX6
SULF1
SYAP1
TANC1
TBC1D8B
TBCEL
TBXAS1
TES
TGFBR2
THAP2
TIAM2
TIMP2
TMCC3
TMED8
TMEM123
TMEM168
TMEM20
TMEM65
TMUB2
TNFAIP1
TNFRSF21
TOPORS
TRAF4
TRIM3
TRIP10
TROVE2
TRPV6
TSG101
TSHZ3
TSR1
TTC9
TUSC2
TXNIP
UBE2Q2
UBE3C
UBXN2B
UEVLD
UFD1L
UGDH
ULK1
UNK
USP3
USP46
VLDLR
VSX1
WASF1
WBP7
WDR42A
WDR60
WEE1
WFS1
XRCC4
XRN1
YPEL2
YTHDF3
ZFP148
ZFP238
ZFP362
ZFP367
ZFP408
ZFP488
ZFP597
ZFP800
ZFP810
ZFP91
ZFPM2
ZFYVE26
ZNFX1
Cibles MIR17
RAB10
BAMBI
MAP3K8
ARHGAP12
LAPTM4A
MYCN
TIAM2
DNASE1L3
PDIA6
PXK
ZFP597
CADPS
6030458C11RIK
RRM2
FNDC1
CASP12
NOL4
NKIRAS1
TMEM123
RB1CC1
SEMA5A
SASH1
COL4A2
HBP1
CHMP4C
SNX16
E2F5
SMOC2
SULF1
1600012H06RIK
MAP3K2
TMEM168
YTHDF3
CAMK4
TES
LILRB3
KLF10
RGMB
NKAPL
ZFPM2
DOCK4
OXR1
FBXO25
MAP3K5
FNDC3B
5730410E15RIK
EIF5A2
DNAJC18
OGFRL1
MYNN
NPAS3
EGLN3
ARHGEF3
CFL2
COLEC10
COL19A1
ZFP800
PCDHA10
HAS2
BRMS1L
FGD4
ATAD2
PCDHB17
TMEM65
KLHL28
2310014L17RIK
IKBKB
5730596K20RIK
ARHGAP26
CROT
ZFP810
DMTF1
PRL7D1
ANKRD28
FRMD6
AC160757.3-202
ERCC6
UFD1L
HS3ST5
CD36
ZFP488
MTPN
CT025653.7-201
HIF1A
MAP6D1
CLCN7
PRR16
UBXN2B
NAPEPLD
SLC22A23
MAOA
MFSD9
CCDC100
WASF1
AA409316
TBXAS1
A730037C10RIK
RP2H
ISOC1
LACE1
PFN
PPP1R3B
SERP1
DCTN4
GNPNAT1
6430573F11RIK
ZFYVE26
DDHD1
SOBP
SLC40A1
4933426M11RIK
TRPV6
SMOC1
OBFC2A
TTC9
ZFP91
NAT12
NHLRC1
SF3B1
D030056L22RIK
UBE3C
BICD2
NEDD4L
GDA
FUT9
MAPK14
SORL1
EPHA7
TBCEL
PNPLA1
AFG3L2
CDKN1A
KLF9
CEP76
DPYSL5
MAPRE3
RRAGD
MFAP3L
SRRP
TMED8
1700021K19RIK
ABCG4
JAZF1
PRR15
VLDLR
OCRL
BMPR2
ZFP148
IL25
TOPORS
CDC37L1
NRBP1
ICOS
LMAN2
MLL1
SMAD7
CAMK1D
RPS6KA5
DIRC2
SGMS1
IRF9
CREB1
6030436E02RIK
PTEN
PAFAH1B2
POLQ
SLC16A12
1200015N20RIK
SH3BP2
ATP11C
TMEM20
PPP2R1B
MTM1
PPARA
ZFP367
HMGB3
EGFR
NPAT
PPP3R1
WFS1
INTS6
WBP7
ANKRD9
IL6RA
SERTAD2
DNAJA4
NAGK
BC038286
DIP2A
MASTL
UBE2Q2
HMBOX1
NXPH2
SPOPL
LRRIQ2
CHRNA2
EPHA4
SCAMP5
GABBR2
AAK1
WDR60
GAB1
CRCT1
IRAK4
NKX3-1
BC043118
RHBDD1
SEMA7A
TSHZ3
COL4A4
C80913
COL4A3
ITGB8
PCDH7
SMC2
GBF1
ABCA1
POLR3G
ASB3
RB1
CYYR1
XRCC4
UGDH
LRCH1
C1QB
FGD5
COL17A1
STK11
ATG16L1
FMNL3
MIDN
TXNIP
2010321M09RIK
TNFRSF21
LIMA1
F2RL2
ARL4C
MAT2B
NETO2
ITFG1
CCNG1
ENPP5
USP46
KLF12
RASL11B
MKNK2
USP3
RAB8B
CHD9
CLOCK
RBL2
MTERFD2
GTF2H2
SLC18A2
IRAK2
FOXB1
2700078E11RIK
NANOS1
1810055E12RIK
5730470L24RIK
ATG7
MAP3K12
EPHA5
RNF152
TSG101
UEVLD
RSBN1
MARCH8
MAGI3
ANO5
PTPN4
IL6ST
KAT2B
SAR1B
SLC5A7
CDKN2AIPNL
DYNC1LI2
CHAF1A
EREG
E030049G20RIK
CCNT2
ASAH3L
SLC24A2
CCNG2
CELSR2
RGMA
SLC17A8
GOLGA2
TRIP10
SLC41A1
ELK3
AP3S2
SEMA4B
C230093N12RIK
TMCC3
FURIN
AC140392.3
EEA1
ATXN1L
JAK1
PBX3
XRN1
F3
DYRK4
SLC25A36
CLIP4
RNF128
TBC1D8B
CAMSAP1L1
CD69
RASD1
CLEC1A
OLR1
LHX9
THAP2
NEUROG2
2310002B06RIK
EIF2AK2
4933439F18RIK
TROVE2
DGKQ
2210012G02RIK
ACSL4
RABGAP1
A630047E20RIK
HELB
GOLGA1
PPP6C
RGL1
ULK1
SLC5A10
EPAS1
STX6
METAP1
RUTBC2
CCDC128
TUSC2
IQSEC2
PIP4K2C
CMPK1
KLHL20
TANC1
ARV1
SLC19A2
RS1
ST6GALNAC3
ANKRD52
REPS2
TRIM3
RBBP7
LHX8
SYAP1
SCN1A
CDK2
KLHL23
WEE1
EIF4G2
BTBD10
WDR42A
SLC2A4
PDE3B
KCNJ10
TGFBR2
P2RX4
CHRNA1
ZFP238
DCUN1D3
KIF26B
PLEKHA3
DERL2
HIGD1A
FBXO28
FBXO39
ANKFY1
FYCO1
SLC30A10
ZFP362
C77080
TSR1
LIMK1
CRK
GOSR1
TRAF4
TNFAIP1
ZFP408
ARHGAP1
RCAN3
SNX8
MYO1D
DAGLB
CAMK2N1
RNF6
YPEL2
FMN1
DGKE
HLF
BAHD1
CAR10
RHOV
MGA
GPR157
SOCS7
CASC4
CTDSPL2
DUSP2
STAT3
1300010M03RIK
EZH1
G6PC
RASSF2
PAK7
TMUB2
MAP3K14
VSX1
PSMF1
DDX5
PLAGL2
MAPRE1
E2F1
UNK
SPINLW1
TIMP2
2410002I01RIK
NCOA3
NPLOC4
CCDC137
ZNFX1
RAB22A
Cibles MIR17
RAB10
BAMBI
MAP3K8
ARHGAP12
LAPTM4A
MYCN
TIAM2
DNASE1L3
PDIA6
PXK
ZFP597
CADPS
6030458C11RIK
RRM2
FNDC1
CASP12
NOL4
NKIRAS1
TMEM123
RB1CC1
SEMA5A
SASH1
COL4A2
HBP1
CHMP4C
SNX16
E2F5
SMOC2
SULF1
1600012H06RIK
MAP3K2
TMEM168
YTHDF3
CAMK4
TES
LILRB3
KLF10
RGMB
NKAPL
ZFPM2
DOCK4
OXR1
FBXO25
MAP3K5
FNDC3B
5730410E15RIK
EIF5A2
DNAJC18
OGFRL1
MYNN
NPAS3
EGLN3
ARHGEF3
CFL2
COLEC10
COL19A1
ZFP800
PCDHA10
HAS2
BRMS1L
FGD4
ATAD2
PCDHB17
TMEM65
KLHL28
2310014L17RIK
IKBKB
5730596K20RIK
ARHGAP26
CROT
ZFP810
DMTF1
PRL7D1
ANKRD28
FRMD6
AC160757.3-202
ERCC6
UFD1L
HS3ST5
CD36
ZFP488
MTPN
CT025653.7-201
HIF1A
MAP6D1
CLCN7
PRR16
UBXN2B
NAPEPLD
SLC22A23
MAOA
MFSD9
CCDC100
WASF1
AA409316
TBXAS1
A730037C10RIK
RP2H
ISOC1
LACE1
PFN
PPP1R3B
SERP1
DCTN4
GNPNAT1
6430573F11RIK
ZFYVE26
DDHD1
SOBP
SLC40A1
4933426M11RIK
TRPV6
SMOC1
OBFC2A
TTC9
ZFP91
NAT12
NHLRC1
SF3B1
D030056L22RIK
UBE3C
BICD2
NEDD4L
GDA
FUT9
MAPK14
SORL1
EPHA7
TBCEL
PNPLA1
AFG3L2
CDKN1A
KLF9
CEP76
DPYSL5
MAPRE3
RRAGD
MFAP3L
SRRP
TMED8
1700021K19RIK
ABCG4
JAZF1
PRR15
VLDLR
OCRL
BMPR2
ZFP148
IL25
TOPORS
CDC37L1
NRBP1
ICOS
LMAN2
MLL1
SMAD7
CAMK1D
RPS6KA5
DIRC2
SGMS1
IRF9
CREB1
6030436E02RIK
PTEN
PAFAH1B2
POLQ
SLC16A12
1200015N20RIK
SH3BP2
ATP11C
TMEM20
PPP2R1B
MTM1
PPARA
ZFP367
HMGB3
EGFR
NPAT
PPP3R1
WFS1
INTS6
WBP7
ANKRD9
IL6RA
SERTAD2
DNAJA4
NAGK
BC038286
DIP2A
MASTL
UBE2Q2
HMBOX1
NXPH2
SPOPL
LRRIQ2
CHRNA2
EPHA4
SCAMP5
GABBR2
AAK1
WDR60
GAB1
CRCT1
IRAK4
NKX3-1
BC043118
RHBDD1
SEMA7A
TSHZ3
COL4A4
C80913
COL4A3
ITGB8
PCDH7
SMC2
GBF1
ABCA1
POLR3G
ASB3
RB1
CYYR1
XRCC4
UGDH
LRCH1
C1QB
FGD5
COL17A1
STK11
ATG16L1
FMNL3
MIDN
TXNIP
2010321M09RIK
TNFRSF21
LIMA1
F2RL2
ARL4C
MAT2B
NETO2
ITFG1
CCNG1
ENPP5
USP46
KLF12
RASL11B
MKNK2
USP3
RAB8B
CHD9
CLOCK
RBL2
MTERFD2
GTF2H2
SLC18A2
IRAK2
FOXB1
2700078E11RIK
NANOS1
1810055E12RIK
5730470L24RIK
ATG7
MAP3K12
EPHA5
RNF152
TSG101
UEVLD
RSBN1
MARCH8
MAGI3
ANO5
PTPN4
IL6ST
KAT2B
SAR1B
SLC5A7
CDKN2AIPNL
DYNC1LI2
CHAF1A
EREG
E030049G20RIK
CCNT2
ASAH3L
SLC24A2
CCNG2
CELSR2
RGMA
SLC17A8
GOLGA2
TRIP10
SLC41A1
ELK3
AP3S2
SEMA4B
C230093N12RIK
TMCC3
FURIN
AC140392.3
EEA1
ATXN1L
JAK1
PBX3
XRN1
F3
DYRK4
SLC25A36
CLIP4
RNF128
TBC1D8B
CAMSAP1L1
CD69
RASD1
CLEC1A
OLR1
LHX9
THAP2
NEUROG2
2310002B06RIK
EIF2AK2
4933439F18RIK
TROVE2
DGKQ
2210012G02RIK
ACSL4
RABGAP1
A630047E20RIK
HELB
GOLGA1
PPP6C
RGL1
ULK1
SLC5A10
EPAS1
STX6
METAP1
RUTBC2
CCDC128
TUSC2
IQSEC2
PIP4K2C
CMPK1
KLHL20
TANC1
ARV1
SLC19A2
RS1
ST6GALNAC3
ANKRD52
REPS2
TRIM3
RBBP7
LHX8
SYAP1
SCN1A
CDK2
KLHL23
WEE1
EIF4G2
BTBD10
WDR42A
SLC2A4
PDE3B
KCNJ10
TGFBR2
P2RX4
CHRNA1
ZFP238
DCUN1D3
KIF26B
PLEKHA3
DERL2
HIGD1A
FBXO28
FBXO39
ANKFY1
FYCO1
SLC30A10
ZFP362
C77080
TSR1
LIMK1
CRK
GOSR1
TRAF4
TNFAIP1
ZFP408
ARHGAP1
RCAN3
SNX8
MYO1D
DAGLB
CAMK2N1
RNF6
YPEL2
FMN1
DGKE
HLF
BAHD1
CAR10
RHOV
MGA
GPR157
SOCS7
CASC4
CTDSPL2
DUSP2
STAT3
1300010M03RIK
EZH1
G6PC
RASSF2
PAK7
TMUB2
MAP3K14
VSX1
PSMF1
DDX5
PLAGL2
MAPRE1
E2F1
UNK
SPINLW1
TIMP2
2410002I01RIK
NCOA3
NPLOC4
CCDC137
ZNFX1
RAB22A
Cibles MIR17
RAB10
BAMBI
MAP3K8
ARHGAP12
LAPTM4A
MYCN
TIAM2
DNASE1L3
PDIA6
PXK
ZFP597
CADPS
6030458C11RIK
RRM2
FNDC1
CASP12
NOL4
NKIRAS1
TMEM123
RB1CC1
SEMA5A
SASH1
COL4A2
HBP1
CHMP4C
SNX16
E2F5
SMOC2
SULF1
1600012H06RIK
MAP3K2
TMEM168
YTHDF3
CAMK4
TES
LILRB3
KLF10
RGMB
NKAPL
ZFPM2
DOCK4
OXR1
FBXO25
MAP3K5
FNDC3B
5730410E15RIK
EIF5A2
DNAJC18
OGFRL1
MYNN
NPAS3
EGLN3
ARHGEF3
CFL2
COLEC10
COL19A1
ZFP800
PCDHA10
HAS2
BRMS1L
FGD4
ATAD2
PCDHB17
TMEM65
KLHL28
2310014L17RIK
IKBKB
5730596K20RIK
ARHGAP26
CROT
ZFP810
DMTF1
PRL7D1
ANKRD28
FRMD6
AC160757.3-202
ERCC6
UFD1L
HS3ST5
CD36
ZFP488
MTPN
CT025653.7-201
HIF1A
MAP6D1
CLCN7
PRR16
UBXN2B
NAPEPLD
SLC22A23
MAOA
MFSD9
CCDC100
WASF1
AA409316
TBXAS1
A730037C10RIK
RP2H
ISOC1
LACE1
PFN
PPP1R3B
SERP1
DCTN4
GNPNAT1
6430573F11RIK
ZFYVE26
DDHD1
SOBP
SLC40A1
4933426M11RIK
TRPV6
SMOC1
OBFC2A
TTC9
ZFP91
NAT12
NHLRC1
SF3B1
D030056L22RIK
UBE3C
BICD2
NEDD4L
GDA
FUT9
MAPK14
SORL1
EPHA7
TBCEL
PNPLA1
AFG3L2
CDKN1A
KLF9
CEP76
DPYSL5
MAPRE3
RRAGD
MFAP3L
SRRP
TMED8
1700021K19RIK
ABCG4
JAZF1
PRR15
VLDLR
OCRL
BMPR2
ZFP148
IL25
TOPORS
CDC37L1
NRBP1
ICOS
LMAN2
MLL1
SMAD7
CAMK1D
RPS6KA5
DIRC2
SGMS1
IRF9
CREB1
6030436E02RIK
PTEN
PAFAH1B2
POLQ
SLC16A12
1200015N20RIK
SH3BP2
ATP11C
TMEM20
PPP2R1B
MTM1
PPARA
ZFP367
HMGB3
EGFR
NPAT
PPP3R1
WFS1
INTS6
WBP7
ANKRD9
IL6RA
SERTAD2
DNAJA4
NAGK
BC038286
DIP2A
MASTL
UBE2Q2
HMBOX1
NXPH2
SPOPL
LRRIQ2
CHRNA2
EPHA4
SCAMP5
GABBR2
AAK1
WDR60
GAB1
CRCT1
IRAK4
NKX3-1
BC043118
RHBDD1
SEMA7A
TSHZ3
COL4A4
C80913
COL4A3
ITGB8
PCDH7
SMC2
GBF1
ABCA1
POLR3G
ASB3
RB1
CYYR1
XRCC4
UGDH
LRCH1
C1QB
FGD5
COL17A1
STK11
ATG16L1
FMNL3
MIDN
TXNIP
2010321M09RIK
TNFRSF21
LIMA1
F2RL2
ARL4C
MAT2B
NETO2
ITFG1
CCNG1
ENPP5
USP46
KLF12
RASL11B
MKNK2
USP3
RAB8B
CHD9
CLOCK
RBL2
MTERFD2
GTF2H2
SLC18A2
IRAK2
FOXB1
2700078E11RIK
NANOS1
1810055E12RIK
5730470L24RIK
ATG7
MAP3K12
EPHA5
RNF152
TSG101
UEVLD
RSBN1
MARCH8
MAGI3
ANO5
PTPN4
IL6ST
KAT2B
SAR1B
SLC5A7
CDKN2AIPNL
DYNC1LI2
CHAF1A
EREG
E030049G20RIK
CCNT2
ASAH3L
SLC24A2
CCNG2
CELSR2
RGMA
SLC17A8
GOLGA2
TRIP10
SLC41A1
ELK3
AP3S2
SEMA4B
C230093N12RIK
TMCC3
FURIN
AC140392.3
EEA1
ATXN1L
JAK1
PBX3
XRN1
F3
DYRK4
SLC25A36
CLIP4
RNF128
TBC1D8B
CAMSAP1L1
CD69
RASD1
CLEC1A
OLR1
LHX9
THAP2
NEUROG2
2310002B06RIK
EIF2AK2
4933439F18RIK
TROVE2
DGKQ
2210012G02RIK
ACSL4
RABGAP1
A630047E20RIK
HELB
GOLGA1
PPP6C
RGL1
ULK1
SLC5A10
EPAS1
STX6
METAP1
RUTBC2
CCDC128
TUSC2
IQSEC2
PIP4K2C
CMPK1
KLHL20
TANC1
ARV1
SLC19A2
RS1
ST6GALNAC3
ANKRD52
REPS2
TRIM3
RBBP7
LHX8
SYAP1
SCN1A
CDK2
KLHL23
WEE1
EIF4G2
BTBD10
WDR42A
SLC2A4
PDE3B
KCNJ10
TGFBR2
P2RX4
CHRNA1
ZFP238
DCUN1D3
KIF26B
PLEKHA3
DERL2
HIGD1A
FBXO28
FBXO39
ANKFY1
FYCO1
SLC30A10
ZFP362
C77080
TSR1
LIMK1
CRK
GOSR1
TRAF4
TNFAIP1
ZFP408
ARHGAP1
RCAN3
SNX8
MYO1D
DAGLB
CAMK2N1
RNF6
YPEL2
FMN1
DGKE
HLF
BAHD1
CAR10
RHOV
MGA
GPR157
SOCS7
CASC4
CTDSPL2
DUSP2
STAT3
1300010M03RIK
EZH1
G6PC
RASSF2
PAK7
TMUB2
MAP3K14
VSX1
PSMF1
DDX5
PLAGL2
MAPRE1
E2F1
UNK
SPINLW1
TIMP2
2410002I01RIK
NCOA3
NPLOC4
CCDC137
ZNFX1
RAB22A
Cibles MIR17
RAB10
BAMBI
MAP3K8
ARHGAP12
LAPTM4A
MYCN
TIAM2
DNASE1L3
PDIA6
PXK
ZFP597
CADPS
6030458C11RIK
RRM2
FNDC1
CASP12
NOL4
NKIRAS1
TMEM123
RB1CC1
SEMA5A
SASH1
COL4A2
HBP1
CHMP4C
SNX16
E2F5
SMOC2
SULF1
1600012H06RIK
MAP3K2
TMEM168
YTHDF3
CAMK4
TES
LILRB3
KLF10
RGMB
NKAPL
ZFPM2
DOCK4
OXR1
FBXO25
MAP3K5
FNDC3B
5730410E15RIK
EIF5A2
DNAJC18
OGFRL1
MYNN
NPAS3
EGLN3
ARHGEF3
CFL2
COLEC10
COL19A1
ZFP800
PCDHA10
HAS2
BRMS1L
FGD4
ATAD2
PCDHB17
TMEM65
KLHL28
2310014L17RIK
IKBKB
5730596K20RIK
ARHGAP26
CROT
ZFP810
DMTF1
PRL7D1
ANKRD28
FRMD6
AC160757.3-202
ERCC6
UFD1L
HS3ST5
CD36
ZFP488
MTPN
CT025653.7-201
HIF1A
MAP6D1
CLCN7
PRR16
UBXN2B
NAPEPLD
SLC22A23
MAOA
MFSD9
CCDC100
WASF1
AA409316
TBXAS1
A730037C10RIK
RP2H
ISOC1
LACE1
PFN
PPP1R3B
SERP1
DCTN4
GNPNAT1
6430573F11RIK
ZFYVE26
DDHD1
SOBP
SLC40A1
4933426M11RIK
TRPV6
SMOC1
OBFC2A
TTC9
ZFP91
NAT12
NHLRC1
SF3B1
D030056L22RIK
UBE3C
BICD2
NEDD4L
GDA
FUT9
MAPK14
SORL1
EPHA7
TBCEL
PNPLA1
AFG3L2
CDKN1A
KLF9
CEP76
DPYSL5
MAPRE3
RRAGD
MFAP3L
SRRP
TMED8
1700021K19RIK
ABCG4
JAZF1
PRR15
VLDLR
OCRL
BMPR2
ZFP148
IL25
TOPORS
CDC37L1
NRBP1
ICOS
LMAN2
MLL1
SMAD7
CAMK1D
RPS6KA5
DIRC2
SGMS1
IRF9
CREB1
6030436E02RIK
PTEN
PAFAH1B2
POLQ
SLC16A12
1200015N20RIK
SH3BP2
ATP11C
TMEM20
PPP2R1B
MTM1
PPARA
ZFP367
HMGB3
EGFR
NPAT
PPP3R1
WFS1
INTS6
WBP7
ANKRD9
IL6RA
SERTAD2
DNAJA4
NAGK
BC038286
DIP2A
MASTL
UBE2Q2
HMBOX1
NXPH2
SPOPL
LRRIQ2
CHRNA2
EPHA4
SCAMP5
GABBR2
AAK1
WDR60
GAB1
CRCT1
IRAK4
NKX3-1
BC043118
RHBDD1
SEMA7A
TSHZ3
COL4A4
C80913
COL4A3
ITGB8
PCDH7
SMC2
GBF1
ABCA1
POLR3G
ASB3
RB1
CYYR1
XRCC4
UGDH
LRCH1
C1QB
FGD5
COL17A1
STK11
ATG16L1
FMNL3
MIDN
TXNIP
2010321M09RIK
TNFRSF21
LIMA1
F2RL2
ARL4C
MAT2B
NETO2
ITFG1
CCNG1
ENPP5
USP46
KLF12
RASL11B
MKNK2
USP3
RAB8B
CHD9
CLOCK
RBL2
MTERFD2
GTF2H2
SLC18A2
IRAK2
FOXB1
2700078E11RIK
NANOS1
1810055E12RIK
5730470L24RIK
ATG7
MAP3K12
EPHA5
RNF152
TSG101
UEVLD
RSBN1
MARCH8
MAGI3
ANO5
PTPN4
IL6ST
KAT2B
SAR1B
SLC5A7
CDKN2AIPNL
DYNC1LI2
CHAF1A
EREG
E030049G20RIK
[truncated: 25,459 more rows]

## Sheet: miR-20a
	miR-20a Targets
		GSEA (+H+D/-H-D)	GSEA (+H-D/-H-D)
miR-20a Targets		NOM p-val=0.011	NOM p-val=0.000
Predicted	Probed	UP-regulated (+H+D/-H-D)	UP-regulated (+H-D/-H-D)	Common UP-Regulated
1200015N20RIK	1300010M03RIK	1300010M03RIK	ACSL4	ACSL4
1300010M03RIK	1600012H06RIK	2310002B06RIK	CCNG2	CNOT4
1600012H06RIK	1700021K19RIK	ACSL4	CDK2	DNAJA4
1700021K19RIK	1810055E12RIK	BC038286	CNOT4	DUSP2
1810055E12RIK	2010321M09RIK	BRMS1L	DIRC2	E2F5
2010321M09RIK	2210012G02RIK	CASP12	DNAJA4	EEA1
2210012G02RIK	2310002B06RIK	CCNT2	DUSP2	EIF5A2
2310002B06RIK	2310014L17RIK	CD36	E2F5	ELK3
2310014L17RIK	5730470L24RIK	CNOT4	EEA1	ENPP5
2410002I01RIK	6030458C11RIK	DNAJA4	EIF4G2	EZH1
2810002I04RIK	AA409316	DUSP2	EIF5A2	FBXO25
5730410E15RIK	ABCA1	E2F5	ELK3	HBP1
5730470L24RIK	ACSL4	EEA1	ENPP5	IKBKB
5730596K20RIK	ANKRD28	EIF5A2	EZH1	MFN2
6030436E02RIK	AP3S2	ELAC1	FBXO25	MKNK2
6030458C11RIK	ARHGAP1	ELK3	FRS2	BC038286
6430573F11RIK	ARHGAP12	ENPP5	HBP1	2310002B06RIK
A630047E20RIK	ARHGEF3	EZH1	HN1	P2RX4
A730037C10RIK	ASB3	FBXO25	IKBKB	PKNOX1
AA409316	ATAD2	FGFR1OP2	IL6ST	PRKX
AAK1	ATP11C	GOSR1	MAP3K12	RAB33B
ABCA1	ATXN1L	HBP1	MAP3K5	RASL11B
AC140392.3	BAMBI	IKBKB	MFN2	RPS6KA5
AC160757.3-202	BC038286	JAK1	MIDN	SMAD7
ACAA1B	BC043118	MFN2	MKNK2	SMOC2
ACSL4	BICD2	MKNK2	ZFP238	SYAP1
AFG3L2	BRMS1L	NEDD4L	BC038286	TUSC2
ANKRD28	C1QB	P2RX4	1700021K19RIK	TXNIP
ANKRD52	C80913	PKNOX1	ZFP367	XRCC4
ANKRD9	CAMK4	PRKX	2310002B06RIK
ANO5	CASP12	RAB33B	OGFRL1
AP3S2	CAST	RASL11B	P2RX4
ARHGAP1	CCNG1	RPS6KA5	PKNOX1
ARHGAP12	CCNG2	SLC18A2	PPP6C
ARHGAP26	CCNT2	SLC40A1	PRKX
ARHGEF10	CD36	SMAD7	RAB22A
ARHGEF18	CD69	SMOC2	RAB33B
ARHGEF3	CDK2	SYAP1	RASL11B
ARL4C	CDKN1A	TUSC2	RPS6KA5
ARV1	CFL2	TXNIP	SEMA5A
ASAH3L	CHAF1A	ULK1	SEMA7A
ASB3	CHRNA1	XRCC4	SMAD7
ATAD2	CLOCK	XRN1	SMOC2
ATG16L1	CNOT4		STYX
ATG7	COL19A1		SYAP1
ATP11C	COL4A2		TUSC2
ATXN1L	CRK		TXNIP
BAHD1	CROT		USP3
BAMBI	CSTF2T		XRCC4
BC038286	DCTN4		ZFP91
BC043118	DDX5
BICD2	DGKE
BMPR2	DIRC2
BRMS1L	DMTF1
BTBD10	DNAJA4
C1QB	DOCK4
C230093N12RIK	DUSP2
C77080	E2F1
C80913	E2F5
CADPS	EEA1
CAMK2N1	EIF4G2
CAMK4	EIF5A2
CAMSAP1L1	ELAC1
CAR10	ELK3
CASP12	ENPP5
CAST	EPAS1
CCDC100	EZH1
CCDC128	F3
CCNG1	FBXO25
CCNG2	FGFR1OP2
CCNT2	FMNL3
CD36	FRS2
CD69	FURIN
CDC37L1	GAB1
CDK2	GAD2
CDKN1A	GDA
CDKN2AIPNL	GNPNAT1
CEACAM20	GOSR1
CEP76	GTF2H2
CFL2	HAS2
CHAF1A	HBP1
CHMP4C	HELB
CHRNA1	HIF1A
CHRNA2	HMGB3
CLCN7	HN1
CLEC1A	ICOS
CLIP4	IKBKB
CLOCK	IL6ST
CMPK1	JAK1
CNOT4	LAPTM4A
COL19A1	LHX8
COL4A2	LIMK1
COL4A3	LMAN2
COL4A4	M6PR
COLEC10	MAP3K12
CRCT1	MAP3K14
CREB1	MAP3K5
CRK	MAP3K8
CROT	MAPK14
CSTF2T	MAPRE1
CT025653.7-201	MAPRE3
CTDSPL2	MASTL
CYYR1	MAT2B
D030056L22RIK	METAP1
D1ERTD53E	MFN2
DAGLB	MGA
DCTN4	MIDN
DCUN1D3	MKNK2
DDHD1	MTPN
DDX5	NANOS1
DERL2	NCOA3
DGKE	NEDD4L
DGKQ	NETO2
DIP2A	NEUROG2
DIRC2	NKIRAS1
DMTF1	NOL4
DNAJA4	OGFRL1
DNAJC18	OXR1
DOCK4	P2RX4
DPYSL5	PAFAH1B2
DUSP2	PBX3
DYNC1LI2	PCDH7
DYRK4	PKD2
E030049G20RIK	PKNOX1
E2F1	PLAGL2
E2F5	PLEKHA3
EEA1	POLR3G
EGLN3	PPP1R3B
EIF2AK2	PPP3R1
EIF4G2	PPP6C
EIF5A2	PRKX
ELAC1	PTEN
ELK3	PTPN4
ENPP5	RAB22A
EPAS1	RAB33B
EPHA4	RABGAP1
EPHA5	RASD1
EPHA7	RASL11B
ERCC6	RASSF2
EREG	RB1CC1
EZH1	RBBP7
F2RL2	RBL2
F3	RGMB
FBXO25	RHOC
FBXO39	RHOV
FGD4	RNF128
FGFR1OP2	RP2H
FMN1	RPS6KA5
FMNL3	RRAGD
FNDC1	RRM2
FNDC3B	RUTBC2
FOXB1	SEMA5A
FRMD6	SEMA7A
FRMPD4	SERTAD2
FRS2	SF3B1
FURIN	SLC16A6
FYCO1	SLC18A2
G6PC	SLC40A1
GAB1	SMAD7
GABBR2	SMOC1
GAD2	SMOC2
GDA	SOCS7
GHSR	SORL1
GNPNAT1	SRRP
GOSR1	STAT3
GPR157	STK11
GRIA2	STYX
GTF2H2	SYAP1
HAS2	TBXAS1
HBP1	TES
HELB	TGFBR2
HIF1A	TIAM2
HLF	TIMP2
HMGB3	TNFAIP1
HN1	TNFRSF21
HS3ST5	TOPORS
ICOS	TSG101
IKBKB	TUSC2
IL25	TXNIP
IL6RA	UBE3C
IL6ST	UFD1L
INTS6	ULK1
IQSEC2	USP3
IRAK4	VLDLR
IRF9	WEE1
ISOC1	XRCC4
ITFG1	XRN1
ITGB8	YTHDF3
JAK1	ZFP148
JAZF1	ZFP238
KAT2B	ZFP367
KCNJ10	ZFP91
KLF10	ZHX2
KLF12
KLHDC5
KLHDC7A
KLHL20
KLHL23
LACE1
LAPTM4A
LBXCOR1
LHX8
LHX9
LILRB3
LIMK1
LMAN2
LRCH1
LRRIQ2
M6PR
MAGI3
MAP3K12
MAP3K14
MAP3K2
MAP3K5
MAP3K8
MAP6D1
MAPK14
MAPRE1
MAPRE3
MARCH8
MASTL
MAT2B
MED13
METAP1
MFAP3L
MFN2
MFSD9
MGA
MIDN
MKNK2
MLL1
MTERFD2
MTM1
MTPN
MYCN
NAGK
NANOS1
NAPEPLD
NAT12
NCOA3
NEDD4L
NETO2
NEUROG2
NKAPL
NKIRAS1
NOL4
NPAS3
NPAT
NPLOC4
NRBP1
NRIP3
NXPH2
OBFC2A
OCRL
OGFRL1
OLR1
OXR1
P140
P2RX4
PAFAH1B2
PAK7
PBX3
PCDH7
PCDHA10
PCDHB17
PDE3B
PDIA6
PFN
PIP4K2C
PKD2
PKNOX1
PLAGL2
PLEKHA3
PNPLA1
POLQ
POLR3G
PPP1R3B
PPP2R1B
PPP3R1
PPP6C
PRKX
PRL7D1
PRR15
PRR16
PSMF1
PTEN
PTPN4
PXK
RAB10
RAB22A
RAB33B
RAB8B
RABGAP1
RASD1
RASL11B
RASSF2
RB1
RB1CC1
RBBP7
RBL2
REPS2
RGL1
RGMA
RGMB
RHBDD1
RHOC
RHOV
RNF128
RNF6
RP2H
RPS6KA5
RRAGD
RRM2
RS1
RSBN1
RUTBC2
SAR1B
SASH1
SCAMP5
SCN1A
SEMA4B
SEMA5A
SEMA7A
SERP1
SERTAD2
SF3B1
SGMS1
SH3BP2
SLC16A12
SLC16A6
SLC17A8
SLC18A2
SLC19A2
SLC22A23
SLC24A2
SLC25A36
SLC30A10
SLC40A1
SLC5A10
SLC5A7
SMAD7
SMC2
SMOC1
SMOC2
SNX16
SNX8
SOBP
SOCS7
SORL1
SPINLW1
SPOPL
SRRP
ST6GALNAC3
STAT3
STK11
STX6
STYX
SYAP1
TANC1
TBC1D8B
TBCEL
TBXAS1
TES
TGFBR2
THAP2
TIAM2
TIMP2
TMCC3
TMED8
TMEM123
TMEM168
TMEM20
TMEM65
TMUB2
TNFAIP1
TNFRSF21
TOPORS
TRIM3
TRIP10
TROVE2
TRPV6
TSG101
TSHZ3
TSR1
TTC9
TUSC2
TXNIP
UBE2Q2
UBE3C
UBXN2B
UEVLD
UFD1L
UGDH
ULK1
UNK
USP3
USP46
VLDLR
VSX1
WASF1
WBP7
WDR42A
WEE1
WFS1
XKR8
XRCC4
XRN1
YTHDF3
ZFP148
ZFP238
ZFP354C
ZFP362
ZFP367
ZFP408
ZFP488
ZFP597
ZFP800
ZFP810
ZFP91
ZFPM2
ZFYVE26
ZHX2
ZNFX1
Cibles MIR20a
RAB10
BAMBI
MAP3K8
ARHGAP12
LAPTM4A
MYCN
TIAM2
PDIA6
PXK
ARHGEF18
ZFP597
CADPS
6030458C11RIK
RRM2
FNDC1
CASP12
NOL4
NKIRAS1
TMEM123
RB1CC1
SEMA5A
SASH1
COL4A2
HBP1
CHMP4C
SNX16
E2F5
SMOC2
1600012H06RIK
MAP3K2
TMEM168
YTHDF3
CAMK4
TES
LILRB3
KLF10
RGMB
NKAPL
ZFPM2
DOCK4
OXR1
GHSR
FBXO25
MAP3K5
FNDC3B
5730410E15RIK
ARHGEF10
EIF5A2
DNAJC18
OGFRL1
NPAS3
EGLN3
ARHGEF3
CFL2
COLEC10
COL19A1
ZFP800
PCDHA10
HAS2
BRMS1L
FGD4
ZHX2
ATAD2
PCDHB17
TMEM65
2310014L17RIK
IKBKB
5730596K20RIK
ARHGAP26
CROT
ZFP810
DMTF1
PRL7D1
ANKRD28
FRMD6
AC160757.3-202
ERCC6
CNOT4
UFD1L
HS3ST5
CD36
ZFP488
MTPN
CT025653.7-201
RAB33B
HIF1A
MAP6D1
CLCN7
PRR16
UBXN2B
NAPEPLD
SLC22A23
MFSD9
CCDC100
WASF1
AA409316
TBXAS1
A730037C10RIK
RP2H
ISOC1
LACE1
PFN
PPP1R3B
STYX
SERP1
DCTN4
GNPNAT1
6430573F11RIK
ZFYVE26
DDHD1
SOBP
SLC40A1
CEACAM20
TRPV6
SMOC1
OBFC2A
TTC9
ZFP91
NAT12
SF3B1
D030056L22RIK
UBE3C
BICD2
NEDD4L
GDA
MAPK14
SORL1
2810002I04RIK
EPHA7
TBCEL
PNPLA1
AFG3L2
GRIA2
CDKN1A
CEP76
DPYSL5
MAPRE3
D1ERTD53E
RRAGD
MFAP3L
SRRP
TMED8
1700021K19RIK
JAZF1
ELAC1
PRR15
VLDLR
OCRL
BMPR2
ZFP148
IL25
TOPORS
CDC37L1
NRBP1
ICOS
LMAN2
MLL1
PKNOX1
SMAD7
RPS6KA5
CSTF2T
DIRC2
SGMS1
IRF9
CREB1
6030436E02RIK
PTEN
PAFAH1B2
POLQ
SLC16A12
1200015N20RIK
SH3BP2
ATP11C
TMEM20
PPP2R1B
MTM1
ZFP367
HMGB3
NPAT
PPP3R1
WFS1
INTS6
WBP7
ANKRD9
IL6RA
SERTAD2
GAD2
DNAJA4
NAGK
BC038286
DIP2A
MASTL
UBE2Q2
NXPH2
SPOPL
LRRIQ2
CHRNA2
EPHA4
SCAMP5
GABBR2
AAK1
GAB1
CRCT1
IRAK4
BC043118
RHBDD1
SEMA7A
TSHZ3
COL4A4
CAST
C80913
COL4A3
ITGB8
PCDH7
SMC2
ABCA1
POLR3G
ASB3
RB1
CYYR1
XRCC4
UGDH
LRCH1
C1QB
LBXCOR1
STK11
PRKX
ATG16L1
FMNL3
MIDN
TXNIP
2010321M09RIK
TNFRSF21
F2RL2
ARL4C
MAT2B
NETO2
ITFG1
CCNG1
ENPP5
USP46
KLF12
RASL11B
MKNK2
USP3
RAB8B
CLOCK
RBL2
MTERFD2
GTF2H2
SLC18A2
FOXB1
NANOS1
1810055E12RIK
5730470L24RIK
ATG7
MAP3K12
EPHA5
TSG101
UEVLD
RSBN1
MARCH8
MAGI3
RHOC
ZFP354C
ANO5
PTPN4
IL6ST
KAT2B
SAR1B
SLC5A7
CDKN2AIPNL
DYNC1LI2
CHAF1A
EREG
E030049G20RIK
CCNT2
ASAH3L
SLC24A2
M6PR
CCNG2
RGMA
SLC17A8
TRIP10
ELK3
AP3S2
SEMA4B
C230093N12RIK
TMCC3
FURIN
AC140392.3
EEA1
ATXN1L
JAK1
PKD2
PBX3
XRN1
F3
DYRK4
SLC25A36
CLIP4
RNF128
TBC1D8B
CAMSAP1L1
CD69
RASD1
CLEC1A
OLR1
LHX9
THAP2
NEUROG2
2310002B06RIK
EIF2AK2
TROVE2
DGKQ
2210012G02RIK
ACSL4
FRS2
RABGAP1
A630047E20RIK
HELB
PPP6C
RGL1
ULK1
SLC5A10
EPAS1
STX6
METAP1
RUTBC2
CCDC128
TUSC2
IQSEC2
PIP4K2C
CMPK1
KLHL20
TANC1
FGFR1OP2
KLHDC5
ARV1
SLC19A2
RS1
ST6GALNAC3
ANKRD52
REPS2
TRIM3
RBBP7
LHX8
SYAP1
SCN1A
CDK2
KLHL23
NRIP3
FRMPD4
WEE1
EIF4G2
BTBD10
WDR42A
PDE3B
KCNJ10
TGFBR2
P2RX4
CHRNA1
ACAA1B
ZFP238
DCUN1D3
PLEKHA3
DERL2
FBXO39
FYCO1
SLC30A10
ZFP362
C77080
TSR1
LIMK1
CRK
GOSR1
XKR8
TNFAIP1
ZFP408
ARHGAP1
SNX8
DAGLB
CAMK2N1
KLHDC7A
RNF6
MED13
FMN1
DGKE
MFN2
HLF
BAHD1
CAR10
RHOV
MGA
GPR157
SOCS7
P140
CTDSPL2
DUSP2
STAT3
1300010M03RIK
EZH1
G6PC
RASSF2
PAK7
TMUB2
MAP3K14
VSX1
PSMF1
DDX5
PLAGL2
MAPRE1
SLC16A6
E2F1
HN1
UNK
SPINLW1
TIMP2
2410002I01RIK
NCOA3
NPLOC4
ZNFX1
RAB22A
Cibles MIR20a
RAB10
BAMBI
MAP3K8
ARHGAP12
LAPTM4A
MYCN
TIAM2
PDIA6
PXK
ARHGEF18
ZFP597
CADPS
6030458C11RIK
RRM2
FNDC1
CASP12
NOL4
NKIRAS1
TMEM123
RB1CC1
SEMA5A
SASH1
COL4A2
HBP1
CHMP4C
SNX16
E2F5
SMOC2
1600012H06RIK
MAP3K2
TMEM168
YTHDF3
CAMK4
TES
LILRB3
KLF10
RGMB
NKAPL
ZFPM2
DOCK4
OXR1
GHSR
FBXO25
MAP3K5
FNDC3B
5730410E15RIK
ARHGEF10
EIF5A2
DNAJC18
OGFRL1
NPAS3
EGLN3
ARHGEF3
CFL2
COLEC10
COL19A1
ZFP800
PCDHA10
HAS2
BRMS1L
FGD4
ZHX2
ATAD2
PCDHB17
TMEM65
2310014L17RIK
IKBKB
5730596K20RIK
ARHGAP26
CROT
ZFP810
DMTF1
PRL7D1
ANKRD28
FRMD6
AC160757.3-202
ERCC6
CNOT4
UFD1L
HS3ST5
CD36
ZFP488
MTPN
CT025653.7-201
RAB33B
HIF1A
MAP6D1
CLCN7
PRR16
UBXN2B
NAPEPLD
SLC22A23
MFSD9
CCDC100
WASF1
AA409316
TBXAS1
A730037C10RIK
RP2H
ISOC1
LACE1
PFN
PPP1R3B
STYX
SERP1
DCTN4
GNPNAT1
6430573F11RIK
ZFYVE26
DDHD1
SOBP
SLC40A1
CEACAM20
TRPV6
SMOC1
OBFC2A
TTC9
ZFP91
NAT12
SF3B1
D030056L22RIK
UBE3C
BICD2
NEDD4L
GDA
MAPK14
SORL1
2810002I04RIK
EPHA7
TBCEL
PNPLA1
AFG3L2
GRIA2
CDKN1A
CEP76
DPYSL5
MAPRE3
D1ERTD53E
RRAGD
MFAP3L
SRRP
TMED8
1700021K19RIK
JAZF1
ELAC1
PRR15
VLDLR
OCRL
BMPR2
ZFP148
IL25
TOPORS
CDC37L1
NRBP1
ICOS
LMAN2
MLL1
PKNOX1
SMAD7
RPS6KA5
CSTF2T
DIRC2
SGMS1
IRF9
CREB1
6030436E02RIK
PTEN
PAFAH1B2
POLQ
SLC16A12
1200015N20RIK
SH3BP2
ATP11C
TMEM20
PPP2R1B
MTM1
ZFP367
HMGB3
NPAT
PPP3R1
WFS1
INTS6
WBP7
ANKRD9
IL6RA
SERTAD2
GAD2
DNAJA4
NAGK
BC038286
DIP2A
MASTL
UBE2Q2
NXPH2
SPOPL
LRRIQ2
CHRNA2
EPHA4
SCAMP5
GABBR2
AAK1
GAB1
CRCT1
IRAK4
BC043118
RHBDD1
SEMA7A
TSHZ3
COL4A4
CAST
C80913
COL4A3
ITGB8
PCDH7
SMC2
ABCA1
POLR3G
ASB3
RB1
CYYR1
XRCC4
UGDH
LRCH1
C1QB
LBXCOR1
STK11
PRKX
ATG16L1
FMNL3
MIDN
TXNIP
2010321M09RIK
TNFRSF21
F2RL2
ARL4C
MAT2B
NETO2
ITFG1
CCNG1
ENPP5
USP46
KLF12
RASL11B
MKNK2
USP3
RAB8B
CLOCK
RBL2
MTERFD2
GTF2H2
SLC18A2
FOXB1
NANOS1
1810055E12RIK
5730470L24RIK
ATG7
MAP3K12
EPHA5
TSG101
UEVLD
RSBN1
MARCH8
MAGI3
RHOC
ZFP354C
ANO5
PTPN4
IL6ST
KAT2B
SAR1B
SLC5A7
CDKN2AIPNL
DYNC1LI2
CHAF1A
EREG
E030049G20RIK
CCNT2
ASAH3L
SLC24A2
M6PR
CCNG2
RGMA
SLC17A8
TRIP10
ELK3
AP3S2
SEMA4B
C230093N12RIK
TMCC3
FURIN
AC140392.3
EEA1
ATXN1L
JAK1
PKD2
PBX3
XRN1
F3
DYRK4
SLC25A36
CLIP4
RNF128
TBC1D8B
CAMSAP1L1
CD69
RASD1
CLEC1A
OLR1
LHX9
THAP2
NEUROG2
2310002B06RIK
EIF2AK2
TROVE2
DGKQ
2210012G02RIK
ACSL4
FRS2
RABGAP1
A630047E20RIK
HELB
PPP6C
RGL1
ULK1
SLC5A10
EPAS1
STX6
METAP1
RUTBC2
CCDC128
TUSC2
IQSEC2
PIP4K2C
CMPK1
KLHL20
TANC1
FGFR1OP2
KLHDC5
ARV1
SLC19A2
RS1
ST6GALNAC3
ANKRD52
REPS2
TRIM3
RBBP7
LHX8
SYAP1
SCN1A
CDK2
KLHL23
NRIP3
FRMPD4
WEE1
EIF4G2
BTBD10
WDR42A
PDE3B
KCNJ10
TGFBR2
P2RX4
CHRNA1
ACAA1B
ZFP238
DCUN1D3
PLEKHA3
DERL2
FBXO39
FYCO1
SLC30A10
ZFP362
C77080
TSR1
LIMK1
CRK
GOSR1
XKR8
TNFAIP1
ZFP408
ARHGAP1
SNX8
DAGLB
CAMK2N1
KLHDC7A
RNF6
MED13
FMN1
DGKE
MFN2
HLF
BAHD1
CAR10
RHOV
MGA
GPR157
SOCS7
P140
CTDSPL2
DUSP2
STAT3
1300010M03RIK
EZH1
G6PC
RASSF2
PAK7
TMUB2
MAP3K14
VSX1
PSMF1
DDX5
PLAGL2
MAPRE1
SLC16A6
E2F1
HN1
UNK
SPINLW1
TIMP2
2410002I01RIK
NCOA3
NPLOC4
ZNFX1
RAB22A
Cibles MIR20a
RAB10
BAMBI
MAP3K8
ARHGAP12
LAPTM4A
MYCN
TIAM2
PDIA6
PXK
ARHGEF18
ZFP597
CADPS
6030458C11RIK
RRM2
FNDC1
CASP12
NOL4
NKIRAS1
TMEM123
RB1CC1
SEMA5A
SASH1
COL4A2
HBP1
CHMP4C
SNX16
E2F5
SMOC2
1600012H06RIK
MAP3K2
TMEM168
YTHDF3
CAMK4
TES
LILRB3
KLF10
RGMB
NKAPL
ZFPM2
DOCK4
OXR1
GHSR
FBXO25
MAP3K5
FNDC3B
5730410E15RIK
ARHGEF10
EIF5A2
DNAJC18
OGFRL1
NPAS3
EGLN3
ARHGEF3
CFL2
COLEC10
COL19A1
ZFP800
PCDHA10
HAS2
BRMS1L
FGD4
ZHX2
ATAD2
PCDHB17
TMEM65
2310014L17RIK
IKBKB
5730596K20RIK
ARHGAP26
CROT
ZFP810
DMTF1
PRL7D1
ANKRD28
FRMD6
AC160757.3-202
ERCC6
CNOT4
UFD1L
HS3ST5
CD36
ZFP488
MTPN
CT025653.7-201
RAB33B
HIF1A
MAP6D1
CLCN7
PRR16
UBXN2B
NAPEPLD
SLC22A23
MFSD9
CCDC100
WASF1
AA409316
TBXAS1
A730037C10RIK
RP2H
ISOC1
LACE1
PFN
PPP1R3B
STYX
SERP1
DCTN4
GNPNAT1
6430573F11RIK
ZFYVE26
DDHD1
SOBP
SLC40A1
CEACAM20
TRPV6
SMOC1
OBFC2A
TTC9
ZFP91
NAT12
SF3B1
D030056L22RIK
UBE3C
BICD2
NEDD4L
GDA
MAPK14
SORL1
2810002I04RIK
EPHA7
TBCEL
PNPLA1
AFG3L2
GRIA2
CDKN1A
CEP76
DPYSL5
MAPRE3
D1ERTD53E
RRAGD
MFAP3L
SRRP
TMED8
1700021K19RIK
JAZF1
ELAC1
PRR15
VLDLR
OCRL
BMPR2
ZFP148
IL25
TOPORS
CDC37L1
NRBP1
ICOS
LMAN2
MLL1
PKNOX1
SMAD7
RPS6KA5
CSTF2T
DIRC2
SGMS1
IRF9
CREB1
6030436E02RIK
PTEN
PAFAH1B2
POLQ
SLC16A12
1200015N20RIK
SH3BP2
ATP11C
TMEM20
PPP2R1B
MTM1
ZFP367
HMGB3
NPAT
PPP3R1
WFS1
INTS6
WBP7
ANKRD9
IL6RA
SERTAD2
GAD2
DNAJA4
NAGK
BC038286
DIP2A
MASTL
UBE2Q2
NXPH2
SPOPL
LRRIQ2
CHRNA2
EPHA4
SCAMP5
GABBR2
AAK1
GAB1
CRCT1
IRAK4
BC043118
RHBDD1
SEMA7A
TSHZ3
COL4A4
CAST
C80913
COL4A3
ITGB8
PCDH7
SMC2
ABCA1
POLR3G
ASB3
RB1
CYYR1
XRCC4
UGDH
LRCH1
C1QB
LBXCOR1
STK11
PRKX
ATG16L1
FMNL3
MIDN
TXNIP
2010321M09RIK
TNFRSF21
F2RL2
ARL4C
MAT2B
NETO2
ITFG1
CCNG1
ENPP5
USP46
KLF12
RASL11B
MKNK2
USP3
RAB8B
CLOCK
RBL2
MTERFD2
GTF2H2
SLC18A2
FOXB1
NANOS1
1810055E12RIK
5730470L24RIK
ATG7
MAP3K12
EPHA5
TSG101
UEVLD
RSBN1
MARCH8
MAGI3
RHOC
ZFP354C
ANO5
PTPN4
IL6ST
KAT2B
SAR1B
SLC5A7
CDKN2AIPNL
DYNC1LI2
CHAF1A
EREG
E030049G20RIK
CCNT2
ASAH3L
SLC24A2
M6PR
CCNG2
RGMA
SLC17A8
TRIP10
ELK3
AP3S2
SEMA4B
C230093N12RIK
TMCC3
FURIN
AC140392.3
EEA1
ATXN1L
JAK1
PKD2
PBX3
XRN1
F3
DYRK4
SLC25A36
CLIP4
RNF128
TBC1D8B
CAMSAP1L1
CD69
RASD1
CLEC1A
OLR1
LHX9
THAP2
NEUROG2
2310002B06RIK
EIF2AK2
TROVE2
DGKQ
2210012G02RIK
ACSL4
FRS2
RABGAP1
A630047E20RIK
HELB
PPP6C
RGL1
ULK1
SLC5A10
EPAS1
STX6
METAP1
RUTBC2
CCDC128
TUSC2
IQSEC2
PIP4K2C
CMPK1
KLHL20
TANC1
FGFR1OP2
KLHDC5
ARV1
SLC19A2
RS1
ST6GALNAC3
ANKRD52
REPS2
TRIM3
RBBP7
LHX8
SYAP1
SCN1A
CDK2
KLHL23
NRIP3
FRMPD4
WEE1
EIF4G2
BTBD10
WDR42A
PDE3B
KCNJ10
TGFBR2
P2RX4
CHRNA1
ACAA1B
ZFP238
DCUN1D3
PLEKHA3
DERL2
FBXO39
FYCO1
SLC30A10
ZFP362
C77080
TSR1
LIMK1
CRK
GOSR1
XKR8
TNFAIP1
ZFP408
ARHGAP1
SNX8
DAGLB
CAMK2N1
KLHDC7A
RNF6
MED13
FMN1
DGKE
MFN2
HLF
BAHD1
CAR10
RHOV
MGA
GPR157
SOCS7
P140
CTDSPL2
DUSP2
STAT3
1300010M03RIK
EZH1
G6PC
RASSF2
PAK7
TMUB2
MAP3K14
VSX1
PSMF1
DDX5
PLAGL2
MAPRE1
SLC16A6
E2F1
HN1
UNK
SPINLW1
TIMP2
2410002I01RIK
NCOA3
NPLOC4
ZNFX1
RAB22A
Cibles MIR20a
RAB10
BAMBI
MAP3K8
ARHGAP12
LAPTM4A
MYCN
TIAM2
PDIA6
PXK
ARHGEF18
ZFP597
CADPS
6030458C11RIK
RRM2
FNDC1
CASP12
NOL4
NKIRAS1
TMEM123
RB1CC1
SEMA5A
SASH1
COL4A2
HBP1
CHMP4C
SNX16
E2F5
SMOC2
1600012H06RIK
MAP3K2
TMEM168
YTHDF3
CAMK4
TES
LILRB3
KLF10
RGMB
NKAPL
ZFPM2
DOCK4
OXR1
GHSR
FBXO25
MAP3K5
FNDC3B
5730410E15RIK
ARHGEF10
EIF5A2
DNAJC18
OGFRL1
NPAS3
EGLN3
ARHGEF3
CFL2
COLEC10
COL19A1
ZFP800
PCDHA10
HAS2
BRMS1L
FGD4
ZHX2
ATAD2
PCDHB17
TMEM65
2310014L17RIK
IKBKB
5730596K20RIK
ARHGAP26
CROT
ZFP810
DMTF1
PRL7D1
ANKRD28
FRMD6
AC160757.3-202
ERCC6
CNOT4
UFD1L
HS3ST5
CD36
ZFP488
MTPN
CT025653.7-201
RAB33B
HIF1A
MAP6D1
CLCN7
PRR16
UBXN2B
NAPEPLD
SLC22A23
MFSD9
CCDC100
WASF1
AA409316
TBXAS1
A730037C10RIK
RP2H
ISOC1
LACE1
PFN
PPP1R3B
STYX
SERP1
DCTN4
GNPNAT1
6430573F11RIK
ZFYVE26
DDHD1
SOBP
SLC40A1
CEACAM20
TRPV6
SMOC1
OBFC2A
TTC9
ZFP91
NAT12
SF3B1
D030056L22RIK
UBE3C
BICD2
NEDD4L
GDA
MAPK14
SORL1
2810002I04RIK
EPHA7
TBCEL
PNPLA1
AFG3L2
GRIA2
CDKN1A
CEP76
DPYSL5
MAPRE3
D1ERTD53E
RRAGD
MFAP3L
SRRP
TMED8
1700021K19RIK
JAZF1
ELAC1
PRR15
VLDLR
OCRL
BMPR2
ZFP148
IL25
TOPORS
CDC37L1
NRBP1
ICOS
LMAN2
MLL1
PKNOX1
SMAD7
RPS6KA5
CSTF2T
DIRC2
SGMS1
IRF9
CREB1
6030436E02RIK
PTEN
PAFAH1B2
POLQ
SLC16A12
1200015N20RIK
SH3BP2
ATP11C
TMEM20
PPP2R1B
MTM1
ZFP367
HMGB3
NPAT
PPP3R1
WFS1
INTS6
WBP7
ANKRD9
IL6RA
SERTAD2
GAD2
DNAJA4
NAGK
BC038286
DIP2A
MASTL
UBE2Q2
NXPH2
SPOPL
LRRIQ2
CHRNA2
EPHA4
SCAMP5
GABBR2
AAK1
GAB1
CRCT1
IRAK4
BC043118
RHBDD1
SEMA7A
TSHZ3
COL4A4
CAST
C80913
COL4A3
ITGB8
PCDH7
SMC2
ABCA1
POLR3G
ASB3
RB1
CYYR1
XRCC4
UGDH
LRCH1
C1QB
LBXCOR1
STK11
PRKX
ATG16L1
FMNL3
MIDN
TXNIP
2010321M09RIK
TNFRSF21
F2RL2
ARL4C
MAT2B
NETO2
ITFG1
CCNG1
ENPP5
USP46
KLF12
RASL11B
MKNK2
USP3
RAB8B
CLOCK
RBL2
MTERFD2
GTF2H2
SLC18A2
FOXB1
NANOS1
1810055E12RIK
5730470L24RIK
ATG7
MAP3K12
EPHA5
TSG101
UEVLD
RSBN1
MARCH8
MAGI3
RHOC
ZFP354C
ANO5
PTPN4
IL6ST
KAT2B
SAR1B
SLC5A7
CDKN2AIPNL
DYNC1LI2
CHAF1A
EREG
E030049G20RIK
CCNT2
ASAH3L
SLC24A2
M6PR
CCNG2
RGMA
SLC17A8
TRIP10
ELK3
AP3S2
SEMA4B
C230093N12RIK
TMCC3
FURIN
AC140392.3
EEA1
ATXN1L
JAK1
PKD2
PBX3
XRN1
F3
DYRK4
SLC25A36
[truncated: 25,139 more rows]

## Sheet: miR-19a
miR-19a Targets
		GSEA (+H+D/-H-D)	GSEA (+H-D/-H-D)
		NOM p-val=0.000	NOM p-val=0.000
Predicted	Probed	UP-regulated (+H+D/-H-D)	UP-regulated (+H-D/-H-D)	Common UP-Regulated
BAMBI	1110067D22RIK	2600010E01RIK	2600010E01RIK	2600010E01RIK
ARHGAP12	2310035C23RIK	2900024C23RIK	ACSL1	ACSL1
MYCN	2310056P07RIK	4921505C17RIK	ACSL4	ACSL4
A930001N09RIK	2510039O18RIK	ACSL1	ADAM12	ADAM12
FBXO8	2600010E01RIK	ACSL4	ALDH3A2	ALDH3A2
2310056P07RIK	2610207I05RIK	ADAM12	BTG1	BTG1
NSG1	2700050L05RIK	ALDH3A2	C330006K01RIK	C330006K01RIK
MSH5	2810403A07RIK	AW549877	CCL11	CCL11
SCD1	2900024C23RIK	BTG1	CNOT4	CNOT4
MECP2	3110050N22RIK	C330006K01RIK	CSMD1	CSMD1
ELMOD2	4921505C17RIK	CASP12	ELK3	ELK3
NSG2	9430020K01RIK	CCL11	FKBP1B	FKBP1B
IGSF3	A930001N09RIK	CCNL1	MAPRE2	MAPRE2
MTMR10	ABCA1	CNOT4	MELK	MELK
SYNCRIP	ABI2	CSMD1	NSG2	NSG2
S1PR1	ABR	ELK3	PDCD10	PDCD10
SYT1	ACADM	ENPP5	PSAP	PSAP
ACADM	ACBD3	ENTPD5	PTPRG	PTPRG
TUB	ACSL1	FKBP1B	RAB33B	RAB33B
ATF2	ACSL4	GNS	RFX1	RFX1
KCNA4	ADAM12	GRB10	RNF38	RNF38
STAT5B	ADNP	HBP1	RPS6KA5	RPS6KA5
ASXL2	AKAP7	KPNA6	SEMA5A	SH3D19
AW549877	ALDH3A2	LPP	SH3D19	SLC9A1
9430020K01RIK	ANXA7	MAPRE2	SLC9A1	SPIRE1
FKBP1B	ARC	MELK	SPIRE1	SPTLC2
BC068281	ARFIP1	MSH5	SPTLC2	TAF4A
RHOB	ARHGAP12	NEK6	TAF4A	TRIM33
4921505C17RIK	ARIH2	NSG1	TRIM33	USP32
SDC1	ARPP19	NSG2	USP32	VAMP1
LAPTM4A	ARRDC3	PDCD10	VAMP1
AKR1C14	ATF2	PSAP
ZFP521	ATP6V1B2	PTPRG
IDI2	AW549877	RAB33B
PTPRG	BTBD7	RFX1
ZMYND11	BTG1	RFX5
SLC4A7	C330006K01RIK	RHOQ
CASP12	C87436	RNF38
ID2	CALM1	RPS6KA5
GM944	CAR8	SGCB
EDARADD	CASP12	SH3D19
QK	CAST	SLC31A2
MAPRE2	CBFB	SLC9A1
3110050N22RIK	CCL11	SMOC2
IGF2R	CCL7	SNX17
ASB4	CCM2	SPIRE1
SEMA5A	CCND2	SPTLC2
ANXA7	CCNL1	TAF4A
FOSL1	CFL2	TCFCP2L1
1700008G05RIK	CHRNA1	TNKS
HBP1	CLOCK	TRIM33
ARFGEF1	CLTC	USP32
SMOC2	CNKSR2	VAMP1
SULF1	CNOT4	VPS29
COMTD1	COG8
KLF10	COMTD1
ZFP192	CSMD1
NHSL1	CYLD
ZFP560	DGCR8
GRK1	DGKE
TNFAIP3	DLX1
5730410E15RIK	EAR11
SLMAP	EBNA1BP2
CSMD1	EIF4A2
APPL1	ELK3
1110002B05RIK	ELOVL5
WASL	ENPP5
CFL2	ENTPD5
SGK1	F3
SKIL	FBXO8
PCDHA10	FKBP1B
IMPDH1	FMR1
FLNC	FOSL1
TTC14	FRAS1
TMEM65	GDA
AKAP7	GM944
EFR3A	GNS
RUNDC3B	GRB10
YIPF5	GRPEL1
INDOL1	GRSF1
HNRNPUL2	GSC
DGCR8	HADHA
2007-09-01	HBP1
RLBP1L2	HIC1
RTN1	IFIT3
WHSC1L1	IGF2R
CNOT4	IGFBP3
HS3ST5	IMPDH1
ARC	KLF16
RAB33B	KPNA6
AC125024.6	LAPTM4A
TBC1D8	LMAN2
PPP2R5E	LPP
SGPP1	LRP2
UBXN2B	LTF
CAR8	MAN1C1
MKRN1	MAPRE2
TM4SF4	MBNL3
TNKS	MECP2
AC153007.4	MEF2A
PATL1	MELK
VPS37A	MKRN1
SLC39A10	MRPL35
SMOC1	MSH5
WDR44	MSX1
KEG1	NEK6
ZFP91	NPEPL1
GPR172B	NSG1
EIF4A2	NSG2
ATXN1	PDCD10
CCNL1	POLD3
LPP	PPARA
NAT12	PPP2R5E
SLC35F1	PRC1
ID4	PSAP
LONRF3	PSD
ENTPD5	PTEN
UBE2A	PTGS2
ST8SIA3	PTPRG
COQ10B	QK
ACSL1	RAB27A
HADHA	RAB33B
EAR11	RAF1
PDCD10	RAP1A
BC022623	RAP1B
RWDD4A	RFX1
GDA	RFX5
NEK9	RHOB
CCDC126	RHOQ
STK38	RNF11
SPIRE1	RNF111
DPYSL5	RNF38
LYRM2	RPS6KA5
PSAP	RSU1
TFRC	S100A11
TRAK2	SCD1
SPTLC2	SCN1B
JAZF1	SDC1
SMARCA2	SEMA5A
ARFIP1	SGCB
S100A11	SGPP1
SNX17	SH3D19
SH3D19	SKIL
ABI2	SLC12A7
NRBP1	SLC30A5
LMAN2	SLC31A2
PRPF18	SLC35A5
PSD3	SLC39A10
TNRC6B	SLC4A7
CALM1	SLC6A8
RPS6KA5	SLC8A1
RAP2C	SLC9A1
8030462N17RIK	SLC9A6
MBNL3	SLMAP
ATP6V1B2	SMARCA2
PTEN	SMOC1
SLC14A2	SMOC2
BTBD7	SNAP23
LIPA	SNX17
IFIT3	SNX7
TMEM32	SOCS3
SLC9A6	SPHK2
REEP3	SPIRE1
CBLN2	SPTLC2
GPR156	STAM
MRPL35	STAT5B
BTAF1	STK38
CCM2	SUGT1
RSU1	SYNCRIP
GSC	SYT1
2810403A07RIK	TAF4A
ST3GAL5	TBC1D8
ADCY1	TCFCP2L1
IGFBP3	TFRC
MREG	THBS1
TFAM	TIMP2
STAM	TMEPAI
FMR1	TNF
REG1	TNKS
GRB10	TOR1B
WNT7B	TRIM33
PPARA	TTC14
SLC35A5	UBE2A
A630050E13RIK	UBL3
CCDC142	USP32
ABHD10	VAMP1
GRPEL1	VPS29
ETL4	VPS4B
ZFP518	WASL
RNF38	WEE1
AFTPH	WNT7B
MSX1	YTHDF2
1110067D22RIK	ZFP238
MELK	ZFP91
SLC6A8	ZMYND11
SCN1B
NR3C2
SNAPIN
TAPT1
SLC12A7
C87436
PKD2L1
DOCK5
HHIP
TNF
TSHZ3
CAST
E130309F12RIK
VSTM2B
EG434179
POLR3D
MCTP1
RFX5
ARRDC3
ABCA1
PSD
RFX1
9130005N14RIK
CC2D1A
ATG16L1
TNPO2
CCDC99
MAP3K7IP3
NPAL1
SUGT1
ENPP5
SLC5A3
GABRB2
SGCB
KLF16
ENC1
SLC31A2
RNF145
CYLD
SOX30
POU4F1
CLOCK
SPHK2
KRT1
ES22
SOAT2
TSPAN2
SLC30A5
RNF111
RAF1
TRIM33
RNF152
2310035C23RIK
E2F8
VPS4B
RAB27A
DSEL
ARPP19
RAP1A
TCFCP2L1
GRSF1
NIPA2
TMEM177
RFX4
SLC5A7
TOR1B
ELOVL5
EPGN
CBFB
CYB561D1
4933426K21RIK
BRWD3
MEF2A
ANKRD56
FRAS1
SLC45A3
PRSS35
HNRNPD
ELK3
PRC1
COG8
ADAMTS7
OPTC
BTG1
AFF1
VAMP1
TGIF1
SNX7
F3
CCND2
RABEPK
ZFP644
PHLDA3
SGIP1
LYCAT
PDE5A
MEMO1
2900024C23RIK
MID2
ACSL4
PTGS2
RAP1B
A630047E20RIK
SLC8A1
NEK6
CREBL2
IRAK3
ATP2C1
ALDH3A2
POLD3
RGL1
GNS
TBK1
BTF3L4
ABHD14B
RHOQ
4922503N01RIK
RNF11
TOR1AIP2
PIGL
CDT1
FAM18B
MBD6
KLHL20
4930519G04RIK
CNKSR2
PIK3R3
PTGES3
KLHDC5
ARIH2
RS1
TIPRL
LRP2
EBNA1BP2
WEE1
LTF
BC057371
DLX1
VPS29
MYCL1
2610207I05RIK
CHRNA1
ZFP238
ADSS
TMEM159
RNF167
SNIP1
MPHOSPH9
ACBD3
PALB2
LEFTY2
ZKSCAN2
FBXO28
NEUROD1
ZFP11
KPNA6
SERTAD4
HIC1
YTHDF2
ABR
TAOK1
2700050L05RIK
SLC9A1
ADAM12
ZDHHC18
PDIK1L
MAN1C1
SUZ12
CHST1
CCL7
CCL11
C330006K01RIK
2600010E01RIK
MUL1
TMEM16A
OTTMUSG00000000997
USP32
DPH4
MED13
1110018M03RIK
CLTC
UBL3
THBS1
DGKE
2510039O18RIK
INOC1
SNAP23
ZC3H8
STK35
TGM3
LSM12
SLC24A3
WNT3
KCNJ2
PHF20
SOCS3
TIMP2
ADNP
TMEPAI
NPEPL1
TAF4A
BHLHB4

## Sheet: miR-19b
miR-19b Targets
		GSEA (+H+D/-H-D)	GSEA (+H-D/-H-D)
		NOM p-val=0.002	NOM p-val=0.000
Predicted	Probed	UP-regulated (+H+D/-H-D)	UP-regulated (+H-D/-H-D)	Common UP-Regulated
2007-09-01	2310035C23RIK	2600010E01RIK	2600010E01RIK	2600010E01RIK
1110002B05RIK	2310056P07RIK	2900024C23RIK	2700050L05RIK	2900024C23RIK
1110018M03RIK	2510039O18RIK	4921505C17RIK	2900024C23RIK	ABCG1
1110067D22RIK	2600010E01RIK	ABCG1	9130011J15RIK	ACSL1
1700008G05RIK	2700050L05RIK	ACSL1	ABCG1	ACSL4
2310035C23RIK	2810403A07RIK	ACSL4	ACSL1	ADAM12
2310056P07RIK	2900024C23RIK	ADAM12	ACSL4	ALDH3A2
2510039O18RIK	3110050N22RIK	ALDH3A2	ADAM12	B930006L02RIK
2600010E01RIK	4921505C17RIK	AW549877	ADNP	BTG1
2700050L05RIK	9130011J15RIK	B930006L02RIK	ALDH3A2	CCL11
2810403A07RIK	9430020K01RIK	BTG1	B930006L02RIK	CCNL1
2900024C23RIK	A930001N09RIK	CASP12	BTG1	CNOT4
3110050N22RIK	ABCA1	CCL11	CCL11	CSMD1
4921505C17RIK	ABCG1	CCNL1	CCNL1	ELK3
4930519G04RIK	ABI2	CNOT4	CNOT4	ENPP5
4932409I22RIK	ACADM	CSMD1	CSMD1	FKBP1B
4933426K21RIK	ACBD3	ELK3	ELK3	FOXJ2
5730410E15RIK	ACSL1	ENPP5	ENPP5	GNS
8030462N17RIK	ACSL4	ENTPD5	FKBP1B	HBP1
9130005N14RIK	ADAM12	FKBP1B	FOXJ2	LPP
9130011J15RIK	ADNP	FOXJ2	GNS	MAPRE2
9430020K01RIK	AKAP7	GNS	HBP1	MELK
A630047E20RIK	ALDH3A2	GRB10	KCTD5	NEK6
A630050E13RIK	ANXA7	HBP1	LPP	NSG1
A930001N09RIK	ARC	KPNA6	MAPRE2	NSG2
ABCA1	ARFIP1	LPP	MELK	PDCD10
ABCG1	ARHGAP12	MAPRE2	MSX1	PSAP
ABHD10	ARIH2	MELK	NEK6	PTPRG
ABHD14B	ARPP19	NEK6	NSG1	RAB33B
ABI2	ARRDC3	NSG1	NSG2	RFX1
AC125024.6	ATF2	NSG2	PDCD10	RNF38
AC153007.4	ATP6V1B2	PDCD10	PSAP	SH3D19
ACADM	AW549877	PSAP	PTPRG	SLC31A2
ACBD3	B930006L02RIK	PTPRG	RAB33B	SLC9A1
ACSL1	BAMBI	RAB33B	RFX1	SMOC2
ACSL4	BTBD7	RFX1	RNF38	SPIRE1
ADAM12	BTG1	RFX5	S100A11	SPTLC2
ADAMTS7	C87436	RNF38	SCN1B	TAF4A
ADCY1	CALM1	SGCB	SDC1	TCFCP2L1
ADNP	CAR8	SH3D19	SEMA5A	TRIM33
ADSS	CASP12	SLC31A2	SH3D19	USP32
AFF1	CAST	SLC9A1	SLC31A2
AFTPH	CBFB	SMOC2	SLC8A1
AKAP7	CCL11	SNX17	SLC9A1
AKR1C14	CCL7	SPIRE1	SMOC2
ALDH3A2	CCM2	SPTLC2	SPIRE1
ANKRD56	CCND2	TAF4A	SPTLC2
ANXA7	CCNL1	TCFCP2L1	TAF4A
APPL1	CFL2	TNKS	TCFCP2L1
ARC	CHRNA1	TRIM33	TRIM33
ARFGEF1	CLOCK	USP32	USP32
ARFIP1	CLTC	VPS29	ZFP238
ARHGAP12	CNKSR2		ZFP367
ARIH2	CNOT4		ZFP91
ARPP19	COG8
ARRDC3	CSMD1
ASB4	CYLD
ASXL2	DGCR8
ATF2	DGKE
ATG16L1	DLX1
ATP2C1	EAR11
ATP6V1B2	EBNA1BP2
ATXN1	EIF4A2
AW549877	ELK3
B930006L02RIK	ELL2
BAMBI	ELOVL5
BC022623	ENPP5
BC057371	ENTPD5
BC068281	ENTPD7
BHLHB4	F3
BRWD3	FBXO8
BTAF1	FKBP1B
BTBD7	FMR1
BTF3L4	FOSL1
BTG1	FOXJ2
C87436	FRAS1
CALM1	GDA
CAR8	GM944
CASP12	GNS
CAST	GRB10
CBFB	GRPEL1
CBLN2	GRSF1
CCDC126	GSC
CCDC142	HADHA
CCDC99	HBP1
CCL11	HIC1
CCL7	HIP2
CCM2	IFIT3
CCND2	IGF2R
CCNL1	IGFBP3
CDT1	IMPDH1
CFL2	KCTD5
CHRNA1	KLF16
CHST1	KPNA6
CLOCK	LAPTM4A
CLTC	LMAN2
CNKSR2	LPP
CNOT4	LRAT
COG8	LRP2
COQ10B	LTF
CREBL2	MAN1C1
CSMD1	MAPRE2
CYB561D1	MBNL3
CYLD	MECP2
DGCR8	MELK
DGKE	MKRN1
DLX1	MRPL35
DPYSL5	MSX1
DSEL	NEK6
E2F8	NPEPL1
EAR11	NSG1
EBNA1BP2	NSG2
EDARADD	PDCD10
EFR3A	POLD3
EG434179	PPARA
EIF4A2	PPP2R5E
ELK3	PRC1
ELL2	PSAP
ELMOD2	PSD
ELOVL5	PTEN
ENC1	PTGS2
ENPP5	PTPRG
ENTPD5	QK
ENTPD7	RAB27A
EPGN	RAB33B
EPHB3	RAF1
ES22	RAP1A
ETL4	RAP1B
F3	RFX1
FBXO8	RFX5
FKBP1B	RHOB
FLNC	RNF11
FMR1	RNF111
FOSL1	RNF38
FOXJ2	RSU1
FOXRED2	S100A11
FRAS1	SCD1
GABRB2	SCN1B
GDA	SDC1
GM944	SEMA5A
GNS	SGCB
GPR172B	SGPP1
GRB10	SH3D19
GRK1	SKIL
GRPEL1	SLC12A7
GRSF1	SLC30A5
GSC	SLC31A2
HADHA	SLC35A5
HBP1	SLC39A10
HHIP	SLC4A7
HIC1	SLC6A8
HIP2	SLC8A1
HNRNPD	SLC9A1
HNRNPUL2	SLC9A6
HS3ST5	SLMAP
HSD17B13	SMARCA2
ID2	SMOC1
ID4	SMOC2
IFIT3	SNAP23
IGF2R	SNX17
IGFBP3	SNX7
IGSF3	SPHK2
IMPDH1	SPIRE1
INOC1	SPRY4
IRAK3	SPTLC2
JAZF1	STAM
KCNA4	STAT5B
KCNJ2	STK38
KCTD5	SUGT1
KEG1	SYNCRIP
KLF10	SYT1
KLF16	TAF4A
KLHDC5	TAL1
KLHL20	TBC1D8
KPNA6	TCFCP2L1
KRT1	TIMP2
LAPTM4A	TMEPAI
LEFTY2	TNF
LIPA	TNKS
LMAN2	TOR1B
LONRF3	TRIM33
LPP	TTC14
LRAT	UBE2A
LRP2	UBL3
LRRC18	UGCG
LSM12	USP32
LTF	VPS29
LYCAT	VPS4B
LYRM2	WASL
MAN1C1	WEE1
MAP3K7IP3	WNT7B
MAPRE2	YTHDF2
MBD6	ZFP238
MBNL3	ZFP367
MCTP1	ZFP91
MECP2	ZMYND11
MED13
MELK
MEMO1
MID2
MKRN1
MPHOSPH9
MREG
MRPL35
MSX1
MTMR10
MUL1
MYCL1
MYCN
NAT12
NEK6
NEK9
NEUROD1
NHSL1
NIPA2
NOSTRIN
NPAL1
NPEPL1
NR3C2
NRBP1
NSG1
NSG2
OPTC
OTTMUSG00000000997
PALB2
PATL1
PCDHA10
PDCD10
PDE5A
PDIK1L
PHF20
PHLDA3
PIGL
PIK3R3
PKD2L1
POLD3
POLR3D
POU4F1
PPARA
PPP2R5E
PRC1
PROKR1
PRPF18
PRSS35
PSAP
PSD
PSD3
PTEN
PTGES3
PTGS2
PTPRG
QK
RAB27A
RAB33B
RABEPK
RAF1
RAP1A
RAP1B
RAP2C
REEP3
REG1
RFX1
RFX4
RFX5
RGL1
RHEBL1
RHOB
RLBP1L2
RNF11
RNF111
RNF145
RNF152
RNF167
RNF19A
RNF38
RS1
RSU1
RTN1
RUNDC3B
RWDD4A
S100A11
S1PR1
SCD1
SCN1B
SDC1
SEMA5A
SERPINB13
SERTAD4
SGCB
SGIP1
SGK1
SGPP1
SH3D19
SKIL
SLC12A7
SLC14A2
SLC24A3
SLC30A5
SLC31A2
SLC35A5
SLC35F1
SLC39A10
SLC45A3
SLC4A7
SLC5A3
SLC5A7
SLC6A2
SLC6A8
SLC8A1
SLC9A1
SLC9A6
SLMAP
SMARCA2
SMOC1
SMOC2
SNAP23
SNAPIN
SNIP1
SNX17
SNX7
SOAT2
SOX30
SPHK2
SPIRE1
SPRY4
SPTLC2
ST3GAL5
ST8SIA3
STAM
STAT5B
STK35
STK38
SUGT1
SULF1
SUZ12
SYNCRIP
SYT1
TAF4A
TAL1
TAOK1
TAPT1
TBC1D8
TBK1
TCFCP2L1
TFAM
TGIF1
TGM3
TIMP2
TIPRL
TM4SF4
TMEM159
TMEM16A
TMEM177
TMEM32
TMEM65
TMEPAI
TNF
TNFAIP3
TNKS
TNPO2
TNRC6B
TOR1AIP2
TOR1B
TRAK2
TRIM33
TSHZ3
TSPAN2
TTC14
TUB
UBE2A
UBL3
UBXN2B
UGCG
USP32
VPS29
VPS37A
VPS4B
VSTM2B
WASL
WDR44
WDR48
WEE1
WHSC1L1
WNT3
WNT7B
YIPF5
YTHDF2
ZC3H8
ZDHHC18
ZFP11
ZFP192
ZFP238
ZFP367
ZFP518
ZFP521
ZFP560
ZFP91
ZKSCAN2
ZMYND11

## Sheet: miR-18
miR-18a Targets
		GSEA (+H+D/-H-D)	GSEA (+H-D/-H-D)
		NOM p-val=0.614	NOM p-val=0.000
Predicted	Probed	DOWN-regulated	DOWN-regulated
KIF3C	IL13RA1	0610007L01RIK	2010309E21RIK
ASXL2	PRDX6	2010309E21RIK	D16ERTD472E
NUP155	TRIB2	D16ERTD472E	DGUOK
TRIB2	D16ERTD472E	IL13RA1	IL13RA1
KLF6	2010309E21RIK	INPP5E	JARID1B
PDZD2	SMAD2	NAB1	KCMF1
ATXN7	SCMH1	PRDX6	LYPLA1
ESR1	INPP5E	SCMH1	NAB1
NKIRAS1	THBS1	SF3B1	PRDX6
LYPLA1	0610007L01RIK	SMAD2	RSU1
ELAVL1	NAB1	THBS1	SCMH1
2700060E02RIK	SF3B1	TRIB2	SF3B1
SEMA5A	AP2B1		THBS1
SNTG1	RABGAP1		TRIB2
STARD4	LYPLA1
PEX3	JARID1B
LIX1	FGF1
DOCK4	LIX1
CADPS2	AGPAT3
UTP23	DOCK4
GPR37	1200016B10RIK
CTGF	PRL7C1
CRKL	IRF2
FGF1	MBNL1
ANK1	FNBP1
GNG3	HIBADH
PRL7C1	2700060E02RIK
SAE1	SON
MFSD8	RSU1
STAR	MYLK
HIF1A	ANK1
AKR1D1	GNG3
NHLRC3	STARD4
CDC2L6	CYP27A1
THEX1	NUP155
CCDC15	ANKRD13C
SLC40A1	ESR1
MBNL1	MAP3K1
FAM115C	UBE2G1
NAB1	PIAS3
IL13RA1	MRPS17
PHF2	HIF1A
HSF2	CCRK
SF3B1	ELAVL1
IRF2	IFIT3
EPHA7	SLC34A2
6430550H21RIK	PHF2
GLRB	NKIRAS1
MAMDC2	SLC8A1
TRAK2	ZFP367
HIBADH	TWSG1
PSD3	KCMF1
ZFP280C	SDC4
MYLK	DGUOK
SMAD2	CTPS2
RPS6KA5	ETV6
IFIT3	WBP2
CBLN3	PRND
RTKN2	SLC12A6
REXO2	SEMA5A
RSU1	CIRBP
ADCY1	MAP3K3
KCMF1	CADPS2
ZFP367	RPS6KA5
CCRK	PCK1
DGUOK	STAR
CYP27A1	PEX3
CYTL1	CTGF
HMBOX1	HSF2
2010309E21RIK	SLC40A1
TBC1D23	KPNA6
AAK1
PPHLN1
TSHZ3
TRAPPC10
SLC34A2
AGPAT3
D16ERTD472E
TMEM167
BTBD14B
CIRBP
INPP5E
SON
PIAS3
SIM2
MAP3K1
FNBP1
5830433M19RIK
HNRNPD
TWSG1
JARID1B
FTSJD1
FGF23
CAMSAP1L1
WDR59
THAP2
RABGAP1
SLC8A1
ETV6
1200016B10RIK
ARL5A
KLHL20
PRDX6
MIP
CTPS2
ANKRD13C
OLFML2B
SCMH1
SMAP2
MTAP7D1
UBE2G1
MRPS17
0610007L01RIK
KPNA6
ORAI3
2700078K21RIK
ALPL
AP2B1
SLC12A6
THBS1
CRKRS
PRND
TXNDC13
MAP3K3
RYA3
UQCC
WBP2
SDC4
PCK1
PTK6

## Sheet: miR-92a
miR-92a Targets
		GSEA (+H+D/-H-D)	GSEA (+H-D/-H-D)
		NOM p-val=0.829	NOM p-val=0.607
Predicted	Probed	DOWN-Regulated	DOWN-Regulated
1700012H17RIK	1700012H17RIK	DNAJC5	ADM
2010012O05RIK	3930401K13RIK	FMR1	AW548124
2200002K05RIK	AARS	GATA2	CD69
2900024O10RIK	ACBD3	HAND1	DNAJC5
3930401K13RIK	ADM	ITGA5	EDEM1
4921523A10RIK	ARRDC3	LATS2	FMR1
4921533L14RIK	ATRX	PAFAH1B1	FNBP4
6330403K07RIK	AW548124	PTPRE	GATA2
A930041I02RIK	AZI2	RAD21	GLA
AARS	BAG3	RHPN2	HAND1
ABHD13	BCL11B	SNAP29	ITGA5
AC092481.28	BRAF	SNAPC1	KIF5B
AC103397.7	BTG2	TRAF3	PTPRE
AC121108.12	C3AR1	VPS54	RAD21
AC158970.3	CCNC	ZIM1	RHPN2
ACBD3	CD69		SNAP29
ADAM23	CDKN1C		SNAPC1
ADM	CHKA		SOCS5
ANKRD24	CHST7		SYPL
ANKRD44	COG3		TCF21
ARMC1	COL11A1		TRAF3
ARRDC3	COL1A2		VPS54
ATP8B1	CPEB3		ZIM1
ATRX	DCBLD1
ATXN3	DDX58
AW548124	DKK3
AZI2	DNAJB9
B3GALT2	DNAJC5
B630019K06RIK	DOCK8
BAG3	DSC2
BCL11B	DUSP10
BRAF	EDEM1
BSDC1	EVI5
BTG2	FHL2
C030046E11RIK	FMR1
C3AR1	FNBP4
C630007B19RIK	FOSL2
CAMK2N1	GATA2
CCDC131	GFPT1
CCNC	GLA
CCNJL	GOLGA4
CD69	GRIA3
CDKN1C	GRP
CHKA	GSTA2
CHST7	HAND1
COG3	HAS2
COL11A1	HERC2
COL1A2	ITGA5
COL27A1	ITGA6
CPEB3	KIF5B
D1ERTD53E	KIFAP3
D4BWG0951E	KNTC1
DCBLD1	LATS2
DDX3Y	LZTS2
DDX58	MAN2A1
DKK3	MAP2K4
DNAJB9	MFHAS1
DNAJC5	MMD
DOCK5	MRP63
DOCK8	MYO10
DOCK9	MYO1B
DPP10	NELF
DSC2	NSMAF
DUSP10	PAFAH1B1
DYNLT3	PCDH9
E030049G20RIK	PCOLCE2
EDEM1	PER2
EG622408	PLEKHM1
ELK4	POLS
ERGIC2	PRKAR1A
EVI5	PTEN
FANCM	PTGER4
FHL2	PTPRE
FMR1	PTPRK
FNBP4	RAD21
FNDC3B	REV3L
FNIP1	RFX1
FOSL2	RGS17
FST	RHPN2
FYCO1	RNF38
GATA2	SGPP1
GCA	SLCO6C1
GFPT1	SMAD7
GLA	SNAP29
GOLGA4	SNAPC1
GPBP1L1	SOCS5
GPR180	SOX11
GPR98	SRPR
GRHL1	SYPL
GRIA3	TAGAP
GRP	TCF21
GSTA2	TRAF3
HAND1	TSGA14
HAS2	UBE2Z
HERC2	UGP2
HERPUD2	UNC84A
HHIP	USP28
HNF1B	USP9X
HOXB8	VPS54
IBSP	WASL
IKZF1	WRNIP1
ISCA1	XRN1
ITGA5	ZIK1
ITGA6	ZIM1
KAT2B
KIF5B
KIFAP3
KLF2
KLHL14
KNTC1
LATS2
LEPROT
LHFPL2
LONRF3
LRCH1
LRRC68
LZTS2
MAN2A1
MAP2K4
MFHAS1
MIS12
MMD
MRP63
MYO10
MYO1B
NDPH
NECAP1
NEFM
NELF
NKX2-3
NOX4
NPTX1
NSMAF
OLFR121
OTTMUSG00000000712
OTTMUSG00000015750
PAFAH1B1
PANX3
PCDH9
PCMTD1
PCOLCE2
PDE10A
PDE4DIP
PDGFD
PDS5B
PDZD2
PER2
PLEKHM1
POF1B
POLK
POLS
PRDM13
PRKAR1A
PSD4
PTEN
PTGER4
PTPRE
PTPRK
PTPRO
RAB9B
RABGAP1L
RAD21
RBPMS2
REV3L
RFX1
RGS17
RHPN2
RNF38
RSBN1
S1PR1
SCN3B
SDRO
SETD5
SFMBT2
SGCG
SGPP1
SLC12A5
SLC25A32
SLC25A36
SLC32A1
SLCO6C1
SMAD6
SMAD7
SMN1
SNAP29
SNAPC1
SNN
SNX18
SOCS5
SOX11
SPRYD4
SRPR
STK39
STX17
SYPL
TACC2
TAGAP
TCF21
TGIF1
THEM4
TOB1
TRAF3
TSGA14
TTC39B
UBASH3B
UBE2Z
UGP2
UNC84A
USP28
USP9X
VMN2R81
VPS54
WASL
WRNIP1
XRN1
YIPF4
ZFP287
ZFP677
ZFP780B
ZFP784
ZIK1
ZIM1

## Sheet: miR-451
miR-451 Targets
		GSEA (+H+D/-H-D)	GSEA (+H-D/-H-D)
		NOM p-val=0.056	NOM p-val=0.307
Predicted	Probed	DOWN-regulated	DOWN-regulated
1110002B05RIK	2810012G03RIK	5730446C15RIK	5730446C15RIK
2810012G03RIK	5730446C15RIK	CDCA7	AACS
2810407C02RIK	AACS	CLOCK	ACTR3
5730446C15RIK	ACTR3	FLI1	CDCA7
AACS	ASH1L	HERPUD1	CLOCK
AC135108.3	ATP11C	MLF1IP	FLI1
AC144621.3-201	CAB39	MYC	HERPUD1
ACTR3	CDCA7	TNFSF11	LYPLA1
AFF4	CDKN2D	YTHDF2	MAPKBP1
AGXT2L1	CHN1		MYC
AKTIP	CLOCK		TNFSF11
ANKRD46	COTL1
ANO6	CPEB3
ASH1L	DACH1
ATMIN	DAPK1
ATP11C	DOCK4
ATP11C	DPYS
BAZ2B	EFHD1
BCL6B	ELAVL2
BEX4	EPB4.1L4A
BTBD3	FLI1
CAB39	GOPC
CDCA7	HERPUD1
CDKN2D	HP1BP3
CHN1	IGF2BP3
CLOCK	ITPK1
COL4A4	LEF1
COTL1	LYPLA1
CPEB3	MAPKBP1
DACH1	MLF1IP
DAPK1	MMD
DAPK1	MME
DNAJC18	MRPS27
DOCK4	MYC
DPYS	NT5M
EDAR	PARG
EFHD1	PELI2
EGLN3	PMP22
ELAVL2	PRKG2
ELOVL7	PSEN1
EN1	PTPN21
EPB4.1L4A	PUM1
ERG	RAC1
FBLN7	RASGRP1
FBXW11	SLC16A2
FGF5	SLCO2A1
FIGN	SYNGR2
FKBP14	TBX19
FLI1	TIMP2
FRMD6	TLR4
G430022H21RIK	TNFSF11
GDF6	TUBE1
GOPC	ULK2
GYK	WNT7B
HERPUD1	YTHDF2
HP1BP3	YWHAZ
IGF2BP3	ZZZ3
ITPK1
KLK7
LDOC1L
LEF1
LIPG
LYPLA1
MAPKBP1
MLF1IP
MMD
MME
MRPS27
MTAP1B
MTAP9
MYC
NT5M
OBFC2A
ODZ2
ONECUT2
PARG
PECAM1
PELI2
PLOD2
PMP22
PPARGC1A
PRKG2
PSD2
PSEN1
PTPN21
PUM1
RAC1
RASGRP1
RAVER1
RBJ
RER1
RFT1
RP23-283N14.16
RTKN2
SAMD4B
SETD5
SLC16A2
SLC38A9
SLC43A2
SLCO2A1
SPRN
SRXN1
STK39
SURF4
SYNGR2
TBC1D23
TBCC
TBX19
TCTEX1D4
TIMP2
TLR4
TMEM209
TMEM26
TMEM51
TMEM85
TNFSF11
TSEN15
TUBE1
ULK2
WASF1
WIF1
WNT7B
WWTR1
YBX1
YTHDF2
YWHAZ
ZFAND3
ZFHX3
ZFP142
ZFP644
ZIC3
ZZZ3

## Sheet: Gene List profile
miR-17/miR-20a common Targets	miR-19a/miR-19b common Targets	miR-451 targets
2310002B06RIK	2600010E01RIK	5730446C15RIK
ACSL4	ACSL1	CDCA7
BC038286	ACSL4	CLOCK
DNAJA4	ADAM12	FLI1
DUSP2	ALDH3A2	HERPUD1
E2F5	BTG1	MLF1IP
EEA1	CCL11	MYC
EIF5A2	CNOT4	TNFSF11
ELK3	CSMD1	YTHDF2
ENPP5	ELK3
EZH1	FKBP1B
FBXO25	MAPRE2
HBP1	MELK
IKBKB	NSG2
MKNK2	PDCD10
P2RX4	PSAP
RASL11B	PTPRG
RPS6KA5	RAB33B
SMAD7	RFX1
SMOC2	RNF38
SYAP1	SH3D19
TUSC2	SLC9A1
TXNIP	SPIRE1
XRCC4	SPTLC2
	TAF4A
	TRIM33
	USP32

## Sheet: Protocol
Protocol used for GSEA analyses
Microarray data :
Microarray data from 745#44 cells untreated (-H-D) or treated for two days in the presence of Dox alone (-H-D), HMBA alone (+H-D) or both Dox and HMBA(+H+D) have been previously obtained (Juban et al, 2009, Mol Cell Biol 29 : 2852-64). These microarray data are provided in the following three accompanying supplementary files included in compressed file "microarray data.zip" :
Manip745.gct (normalized expression data)
Manip745.chip (microarray probe description)
Manip745.cls (class description)
Protocol used for GSEA analyses
Lists of predicted miRNA targets were established from the miRWalk database (http://www.umm.uni-heidelberg.de/apps/zmf/mirwalk/) by compiling all mouse transcripts with 3’UTR harboring putative target sequences predicted by the three different algorithms miRanda, miRDB and miRWalk with a p value <0.05. Predicted target gene lists were then used to perform gene set enrichment analyses using the GS…
Presentation of gene lists generated by GSEA
Gene list results are given on separate sheets for each miRNA in file "Gene Lists GSEA.xlsx" :
Column 1 : predicted target gene list used for GSEA
Column 2 : subset list of predicted target genes present on microaarray
Column 3 : leading edge subset of genes that were found to be either up or downregulated by comparing –H-D vs +H+D (normalized p value indicated on the top of the column)
Column 4 : leading edge subset gene list that were found to be either up or downregulated by comparing –H-D vs +H+D (normalized p value indicated on the top of the column)
Column 5 : intersection between leadig edge gene lists in columns 3 and 4.
Lists of leading edge common targets for miR-17 and miR-20 (intersection of the four gene lists in columns 3 and 4 on sheets miR-17 and miR-20) , miR-19a and miR19b (intersection of the four gene lists in columns 3 and 4 on sheets miR-19a and miR-19b) as well as for miR-451 (intersection of gene lists in columns 3 and 4 in sheet miR-451) that have been used to generate the histograms presented in…
